# Supplementary material for: Collagen’s Triglycine Repeat Number and Phylogeny Suggest an Interdomain Transfer Event from a Devonian or Silurian Organism into Trichodesmium erythraeum
Source: PubMed Central journal article supplement — J Mol Evol. 2008 Jun 3;66(6):539–54. doi: 10.1007/s00239-008-9111-7 (PMC2443231; doi:10.1007/s00239-008-9111-7), 2008-06-03
Supplement: 239_2008_9111_MOESM1_ESM.pdf [file 239_2008_9111_MOESM1_ESM.pdf]

gl y\_unwei ghted\_fasta. fasta

>' Bacillus cereus ATCC 10987' collagen  
mkerdkqnslnsnfri spnl i gptfppvptgftgi gi tgptgpggptgpggprgl qgpmgemgptgpgqg  
qgi qgpvgsi gatgpegqqgppqgl rpgqgetgatgpgqvqgl qgpagptgatgaqgi qgi qgl qgpi gat  
gpegpqi qgvqgl ppatgpgqi qgaqgmqgl qgpgsntgatgatqgi tgptgvtgptgi tg-----

-----psggppgptgptgatgpgggpsgstgatgatgntgatgstgvt  
gstgvtgatgstgptgstgaqgl qgi qgi qgpi gptgpegpqi qgi pgptgvtgeqgi qgvqgi qgatg  
atgdqgppqi qgai gpqgatgatgdqgppqi qgvpgpsgatgpgqvqgl qgpmgdi gptgpegpegl qgp  
qgi qgvpgpvatgpegpqi qgi qgpvatgpgqppqi qgi qgvqgi tgatgvqatgi qgi qgei gat  
gpegpqqvqgaqgi gptgpmgpgqvqgvqgi qgatgaqgvqppqi qgi qgi qgi qgptgatgdtgatg  
atgeggtgptgvtgptgpgsgpaggptgptgpgspagvtgpgsgppgptgatgatgvtgdtgatgstgvtg  
atgetgatgvtgl qgpqi qgvqgei gptgpgqvqppqi qgvtgatgdqgppqvqppqdi gptgpgqi  
qgpqgsqi qgatggtgaqppqi qgpqgdvgtgpgqptgi qgi qgei gptgpegpegl qgpqi qgvq  
gpvgatgpegpqi qgi qgvqgatgsqppqi qgi qgvqgi tgatgaqatgi qgi qgei gatgpegpqq  
vqgvqgei gptgpmgpgqvqgvqgi qgatgaqgvqppqi qgi qgptgatgetgatgatgeggtgptgvt  
gptgvtgpgsgpaggptgptgpgspagvtgpgsgppgptgatgatgatgvtgdtgatgstgvtgatgetga  
tgvtgl qgpqi qgvqgei gptgpgqi qgpqi qgvtgatgaqppqi qgpqgdi gptgpgqi qgpqppq  
gi qgatgatgaqppqi qgpqgei gptgpgqppqi qgpqi qgptgatgatgatgl qgi qgpqi qgpqg  
i qgptgatgatgatgl qgi qgpqi qgpqi qgptgatgatgatgl qgi qgpqi qgpqi qgptgatga  
tgatgsqgptgdtgptgagatgatgatgvsttatyafanntsgtai svl l ggtni pl pnnqi gpgi tvs  
ggntvftvasagnyyi ayti nl tagl l vssri tvngspl agti naptvatgsfsati i anl pagaai sl q  
l fgl vai atl sttptgat l ti i rl s

>' Dani o reri o (zebrafish)' type I alpha 1  
mfsfvdi rllal l satvl l argqgeddrtggsctl dgqvyndrdvkwpepcqi cvcdsgtvmcdevi ced  
tsdcpnvi phdeccpvcppdddfqepsvegprgsppgdkgergpagppgndgi pgqpgl pggpg-----

-----ppgppgl ggnfspqmsggfdeks-spmavpgpmgpmgprgagp  
ppgpgpqqgftgppgepgeagapgpmgprgaagppgkngedgsgkprpgergpppgqgargfpgtpgl  
pgi kghrgfsgl dgakgdagpagpkgepgagpengtngamgprgl pgergragppgaagargndgaagaa  
gppgptgpagppgfpggpgskgevpqgsrgaegpqqargeagnpgpagpagngadgapgakgapg  
apgi agapgfpgprgppgaagaagapgpkgntgeagapgakgeagakgeagaqgvqppppgpegkrp  
rgepgaggargptgergapgarfpgadgaagprgapergpgvvpkgatgepgrngepgmpgskgmt  
gspgspgpdgktgl agapqdgprgppgpvgargqpgvmgfpkgkaageagkpgergvmgai gatgapg  
kdgdvgapgapppagpgergeqgaagppgfqgl ppgqgatgepgksgeqgapgeagapppsgsrgdrgf  
pgergapppagpvgarpsgsagndgakgesgaagapgaqppgl qgmpgergaagl pgl kgdrgdqgak  
gadgaagkdg rmtgpi gppgpagapgdkgesgaqgl vgptgargppgergetgapppagfagppgadg  
l pgakgepgdngakgdagapppagatgagppqpvatgpkgar gaagppgatgfpgaagrvgppgsgn  
sgpppppagkegkgnrgetgpagrtgevgaaagppgagpekgnpaegatgpagi pppqi ggrgi v  
gl pgrgergfpgl ppgsgei gkqpsgspgergppgpmgppgl agppgepgergtgpnegsagrdaag  
pkdrgetgpgstgpagppgaagpi gpagktgdrgetgpagvppagpsgprgpgspagargdkgetge  
agergmkghrgftgmpgppgppgsgesgpagasgpagprgpagsagsagkdgmsgl ppgi gppgprgrn  
gei gpagppppppgagppsgggfdi gfi aqp-qekapdpfr-----

-----hfraddanvmrdrl  
evdttl ksl sqqi esi i spdgtkknpartcrdl kmchpdwksgeywi dpdqcnq dai kvycnmetgetc  
vnptesai pkknwytskni kekhhwfwgeamtdgfqfeygsegskpedvni ql tfl rl msteasqi tyh  
cknsi aymdqasnl kkal l l qgsnei ei raegnsrftysvtedgctsthtgawgktvi dykttktsrl pi  
i di apmdvgapnqefgi evgpvcfl

>' Dani o reri o (zebrafish)' type I alpha 3  
mfsfvdi rllgl l aavvl avrgqgeddi sfgsctl egqnyndkdvkwpepcqi cvcdsgtvmcdevi ced  
tsdcanpei pdgeccpi cpdeevtaapeppyvdtvgpagp-----rgdpgpvppgrdgtngen-----

-----gl pggppgpgtsgl gggsfl sqmaygsekssgppqgppgpmgprgl pg  
pagspgpqqgftgppgepgepagpmpsrppgppgkngedgagkagrpgergaagpqqgargfpgtpgl

gl y\_unwei ghted\_fasta. fasta

pgi kghrgfpgl dgakgdagi agpkgeagspgeagtpgamargl pgergrpppppsgargndgntgaa  
gppgptgpagppgfpggagakgetgaaggrgseppqgprgepgnppagaagpaggppsdtppgkgsppg  
aagi agapgfpgarppppagpngagppkgnngdpgl qpkgdagpkgeppvppqgl agnageegkrga  
rgepgaagpvpppgargapgnrgl pgsdgappl gapgergangpmaaggasgesgrppgepl pgskgmt  
gapgsppgdgkagpsgapqddgrpppppagsrgapgvmgfpgpkgt dgesgkppgergl agptgpl gapg  
kdgdi gspgapgpapagekgeqgsagpsgfqgl pgaagatgetgkppgeqgl pgeagpsgspgprgdrf  
pgergapppgptgprgapsppndgakgeppgaaganggvppagmqmpgergagmpgargdrdggpk  
gpdgapgkdgvrgmtgpi gppgspgapgdkeppgavpppl tprgppgergevgapppagfagppggng  
qqgakgetgdsapkgdagapgpavgasppqppagatgpkgarggagppgatgfpgaagrvgppgppsga  
sgppgptgpagkeqrgargekppagrppgeagaagpppsgergsppgdgpl gl agapppgvi gsrgi v  
gl pqrgergfagl agpsgeppkqgppsgpvgerppppmpppl sgapgeagregnpghdgvsgdrdppg  
pkdrgesgnsppgagppagppgi gpsgktdrgeagppagpsppagargal gpagprgdrgeage  
agergmkghrgl sgmpgvppgptsggeqppagatgpagprgpagsngsppgkdgmnvgppvppppgrgs  
gemppagapgl pppppppgsagppgepl pmpqqekgpdpl rgg-----

-----yraddasvrdrds  
evdtsl ksl sqki eni rspegtqanparmcrdl rmchpewksgsywvdpnqgspl dai kvfcnmetgetc  
vspyhdsi prknwytskni rekkhwfgesmpngfqqfygsdgsdpedvni ql tfmrl msnqgsqni tyh  
cknsi aymdetsgnl kkal l l qgsndi ei raegnsrftyrvsedgctsthtgtwgtkvi dykttktsrl pi  
i di apmdi gapdqefgvevppvcfl

>'Drosophila melanogaster (fruit fly)' type IV alpha 1  
ml pfwkrl l yaavi agal vgadaqfwktagtagsi qdsvkhynrnepkfpi ddsydi vdsagvargdl pp  
knctagyagcvpkci aekgnrgl pppl gptgl kgemgfpgmegpsgdkgqkdppgyqrgdkgergspg  
l hgqagvppvqppagnppagpi ngkdgcddgdgi pgl egl sgmpgprgyagql gskgekgepakengdya  
kgekgeppwrgtagl agppgfpgekgergdsppygakpprgehgl kgekgascygpmkppagpi kgekge  
passfpvkphtvmgprgdmgqkgepl vgrkgeppgedtgl dgqkgekgl pggppgdrgrqgnfppgs  
tqkkgdrgepl ngl pgnppqkgeppragatgepl l gppppppgggrtppppgkpprgyvgapppqgl  
ngvdgl pppqyngqkdaggl pprpneppppgkgektagl ngpkgsi gpi ghpppppegqkdagl p  
gygi qgskgdagi pgyppgl kgskgergfkgnagapgdskl grpgtppaagapqkkgdagrpgtppqkdm  
gi kgdvggkcsscragpkgdktsgl pgi pgkdgarppppgergyppgerghdgi ngqtgppgekgedgrtg  
l ppatgeppkpal cdl sl i epl kgdkgypgagpakgvqgfkaegl pgi pppkgefgekgl sgapgn  
dgtpragrddgyppi pqqsi kgeppfhrdgdakgdksfgrsgekgeppscal dei kmpakgnkgeppqt  
gmppppedgspgergytgi kgntgppqppgvepprgl ngprgekgnqgavgvppgnppkdgl rgi pgrng  
pppprgeppi srpppmpppl ngl qgekgrgptgpi gfpagadsvgyppgdrdagl pgvsgppgi vgek  
gdvppi gpagvappppvppi dgvrgrdgakgeppsgpl vmppgnkgdrgapndgpkfagvtgapgkrg  
papi pgvsgakgdkgasgl tndgppvgrppppagpl mgi kgdqgl agapqqgl dmpgekgnqgfpl  
dpppl pgdasekqkgepppsgl rgdtgpagtppwpekgpl pgl avhgragppgekdgqrsi dgrdg  
i ngekgeqgl qvvgppgeksgsvgapi ppagmdgl pgaagapgvgyppgdrgdkepl gl pgl kge  
tppvpl qgftgapppkgergi rqqpl patvpdi rgdkgsqgergytgekgeqgergl tppagvagakgd  
rgl qpppgasgl ngi ppakgdi gprgei gypgvti kgekgl pprpgrnrgl i gappl i gergl pgl pe  
srl vgl pppi gpagskgergl agspgppqdgfppagpl kgdtgppqgfkggergl ngfegqkdkgdrgl q  
gpsgl pgl vqkgtgyppl ngndgppvppgergftgpkgrdgrdgtpl ppqkgeppml pppgkgepp  
ppgrnppkgepprgergl i gi qqel gekgergl i getgnvppgpkgdrgeppgergygai gl i gqkge  
ppagapaa dyl tli i trhsqsetvpacsaghtel wtgysl l yvdgndyahnqdl gscvprfstl pvl s  
cgqnnvcnyasrndktfwl ttnaai pmpveni ei rqi srcvceapanvi avhsqti evpdcppngweg  
l wi gysfl mhtavnggggqal qspgsl edfratpfi ecngakgtchfyetmtsfwmyl essqperp  
qqqt i kagerqshvsrcqvcmkns

>'Gallus gallus (chicken)' type I alpha 2  
ml sfvdtri l l l l avtsyl atsqhvseasagrkgprgdkgqgergpppppprdgedgppppppppppp  
l ggnfaaqydpaskaadfgpppmgl mgprpppgasgppppppgfqgvppgeppgqtgppqpprppppppgka  
ge-----

-----dghpgkpprppergvaggppargfpgtppg  
pgfkgi rghngl dgl tqppagptkgeppagpengtppqppgargl pgergri gapppagarsdgsagpt  
gpa-xxxxxxxxxxxxxxxxxgei gpagnegptgpapprgei gl pgsppvppppnppangl ppakgaag  
l pvvagapgl ppprgi pppppagpsgargl vgepppagakgesgnkgeppgaagpppppppsgeegkrgs  
ngeppsagppppagl rpeppsgl ppadragvmppagnrgasppvagakppngdagrppgepl mpprxxx  
xxxxxxxxxxxxxxxxxgfpagdrvgpi gpagnrgeppni gfpgkgtgeppkpekgenvgl agpprapp  
pegnngaqqppgvtgnqqakgetgpagppgfqgl ppsppageagkppgergl hgefvgppagppgergl  
ppesgavppagi gsrppsgpppdgnkgeppnvgpapppagppgi pgergvagvppgkgekagpl r

gl y\_unwei ghted\_fasta. fasta

gdtgatgrdgargl pgai gapgpaggagdrgeggpagpagargi pgergepgvpvpsgfagppgaag  
qpgakgergpkpkgetgptgai gpi gasgppgvgaagpagprgdagppgmtgfpagaagrvppppagi  
tgppppppagkdgrgl rgdvvpvgrtgeqqi agppgfagekgpsgeagaagppgtppqqi l gapi l  
gl pgsrgergl pgi agatgeppgl gvsppgargpsgpvgsppngapgeagr dgnpgndgppgrdgapp  
fkgergapgnppsgal gapgphqvpsgkpgnr gdpvvpvpgafgprgl agppgrgekgppgd  
kghrgl pgl kghngl qgl pgl agqhdqgppgnngpagprpppsgppgkdgrngl pgi gpavrgsh  
gsqgpagppppppppppppnggyevgfdaeyyradqpsl rp-----  
-----

-----kdy  
evdatl ktl nnqi etl l tpegscknpartcrdl rl shpewssgyfi dnnqgctadai raycdfatgetc  
i hasl edi ptktwyvsknkdkkhi wfgeti nggtqfeyngevttkdmatl afmrl l anhasqni tyh  
cknsi aymdeetgnl kkavi l qgsndvel raegnsrftfsvl vdgcskknkkgkti i eyrtknpsrl pi  
l di apl di ggadqefgl hi gpvcfk

>' Gallus gallus (chicken)' type II alpha 1  
mhgrprpsaalllllllltaaaaaq-----  
-----rdl rppgpkqkgepgdi kdvvprgppppqppageqqrgdrgek  
gekgapgp-----  
-----

-----rgrdgepgtpgnppppppppppppgl ggnfaaqmaggfdekaggaqmgvmqgpmgmprgppp  
ptgapppqgfqgnpgepggegaagpmprgppppgkpgddgetgkpgksgergppppqgargfpgtpgl  
pgvkghrgypgl dgakgeagpagkgesgsppngsppmgprgl pgergrppsgaagargndgl pppa  
ppppvpagapgfpgapgskgeagptgargpegaqpprgesgtppsgppagapgnpgtdgi pgakgsag  
apgi agapgfpprgppppqatgpl gpkqgtgepgi agfkgeqqpkgetgpapppagppageegkrga  
rgepgaagvpvppgergagprgrfpgqdg l agpkgapgerppagl agpkgatgdpprppgepgl pgargl t  
grpgdagppqkvgtgappedrppppppqargqppvmgfpgpkgangepgkagekgl ppapgl rgl pg  
kdgetgaagpppagvpgergeqgappsgfql pppppppgesgkpgdqgvpeagapgl vprgergf  
pgergsppaagl qpprgl pgtpgtdgpkgatgpagpngaqqppgl qmpgergaagi agl kgdrdvgek  
gpegapgdgargl tgpi ppppagpngekgesppppsgaagargapgergeppagppagfagppgadg  
qpgakgeqqepgqkdagapppqpsgapppqptgvtgpkgar gaqppga tgfpaagrvppppngn  
pppppppsagkdgpkgvrgdagppragdpgl qppagppgekgeppedgpapppppppqgl agqrgi v  
gl ppprgergfpl ppsgepgkqgapsagdrppppvpvppgl tppageppregnpgadgl pgrdgaag  
vkdrgetgvpvappagppagppvgtgkqdrgetgaqppmgsppagargmppppppprgdkgetge  
agergl kghrgftgl qgl pppppsgdqgaagppagpprgppppvpsgkdgshgmpgpi gppgprgrs  
geppagppgnppppppppppgtgi dmsafagl qktekppdi -----  
-----

-----rymradeaaggl rghd  
vevdatl ksl nnqi esi rspegscknpartcrdl kl chpewksdyfi dnnqgctl dai kvfcmetget  
cvyptpsi prknwtsktdkhhvwfaeti nggfhsygdnl spntasi qmtfl rl l stegsqnvtih  
cknsi aymdeetgnl kkai l i qgsndvei raegnsrftysvl edgctkhtgkkgkti vi eyrl qktsrl si  
vdtapmdi ggadqefgvdv gpvcfl

>' Gallus gallus (chicken)' type V alpha 2  
al pgsppgdppppgl gppgl pgl kgdsgpkgekghpgl i gl i gppgeqqekgdrgl pppqgsagpkgegg  
i tgpsgpi gppppppgl pppppkagkssgptgpkgesgl pppppppppgevi qpl pi qsskrtrni d  
asq-----  
-----  
-----  
-----  
-----  
-----  
-----  
-----  
-----  
-----  
-----  
-----  
-----  
-----  
-----  
-----  
-----

gl y\_unwei ghted\_fasta. fasta

-----I vddgnadnymd  
yadgmeei fgsi nsl kl ei eqmkhpl gtqhnpartckdl ql chpdfpdgeyvwdpnqgcsrdsfkvycnf  
taggetci fpdkksegari tswpkenpgswfsefkrkgl l syvdsdgnpi gvvqmtfl r l l sasahqni t  
yncyqsvawhdattdsyd kai rfl gsndeemsydnpyi raafdgc aakkgyqktvl ei ntpkveqvpi v  
di mfndfgeasqkfgfevgpacfmg

>'Homo sapiens (human)' type I alpha 1  
mfsfvdl r l l l l aatal l thgqeegqveggdedi ppi tcvqngl ryhdrdvwkpepcri cvcdngkvl c  
ddvi cdetkncpgaevpegeccpvcpdgsesptdqettgvegpkgdtgprgprgpapppgrdgi pggppl

-----pgpppppppppppgl ggnfapql sygydekstggi svpgpmgppsgprgl pg  
ppgappqqgfqpppgepgepgasgpmgprgppppgkngddgeagkpprgergppppqgargl pgtagl  
pgmkghrgfsgl dgakgdagpagpkgepgsgengapqmgprgl pgergrpgapppagargndgatgaa  
gpppgtgpagppgfpgavgakgeagppqprgseppqgvrgpgeppppagaagpagnpgadgppgakgang  
appi agapgfpgargpsppqppppgpkngsgeppagpskgdtgakgeppvgvqpppppageegkr ga  
rgepgptgl ppppgerggpgrgfpagadvagpkpgergsppgpagpkgspeagrpeagl pgakgl t  
gsppsgppdgktgppppagqdrppppppgargqagvmgfpgpkgaaageppkagergvppppgavgpag  
kdgeagaqqppppagpgergeqqpagspfgql ppppppgeagkpgeqqvpgdl gapppsgargergf  
pgergvqppppagprgangapndgakgdagapagpsqgagpl qgmpgergaagl pppkgrgdagpk  
gadgsppkdgvr gl t gpi gppppagapgdkgesgppagptgargapdrgepppppagfagppgadg  
qpgakgeppdagakgdagppppagpappgpi gnvgapgakgargsagppgatgfpgaagrvgpppsgn  
agpppppppagkeggkgrgetgpagrpevgpppppppagekgsppadgpapagtpgpqgi agqrgvv  
gl ppprgergfpgl pppsgppkqppsgasgerppppmpppgl agppgesregappaegspprdgspg  
akgrgetgpapppagpappagppvppagksgrgetgpapagppvgpvargpappppgrgdgkgetge  
qgdr gi kghrgfsgl qppppppgspeqqpsgasppagprgppgsagapgdgl ngl pppi gpppprgt  
gdagpvpppppppppppppsagfdfsfl ppppkekahdgg

-----yrraddanvvrdrdl  
evdttl ksl sqqi eni rspegrknpartcrdl kmchsdwksgeywi dppnqcnl dai kvfcmetgetc  
vyptqpsvaqknwyi sknpkdkrhvwfgesmtdgqfeyggqgsdpadvai ql tfl r l msteasqni tyh  
cknsvaymdqqtgnl kkal l l qgsnei ei raegnsrftysvtvdgctshgawgkvti eykttktsr l pi  
i dvapl dvgapdqefgfdvgpvcfl

>'Homo sapiens (human)' type II alpha-1  
mi r l gapqsl vl l tl l vaavl rcqqqdvqeagscvqdqgryndkdvwkpepcri cvcdtgvtl cddi i ce  
dvkdcl spei pfgeccpi cptdl atasgppgpkqkgeppgi kdi vgpkgppppqpppageqqpprgdrdk  
gekgapgp

-----rgrdgepgtgnpppppppppppgl ggnfaaqmaggfdekaggaql gvmqgppmmpgprgppg  
pagappqqgfqgnpgepgepgvsgpmgprgppppgkpgddgeagkppkagergppppqgargfpgtpgl  
pgvkghrgypgl dgakgeagapgvkgesgspgengspgmpgprgl pgergrtpagaagargndgppgpa  
gppppvppagppgfpgappakgeagptgarpegaqpprgepgtpgsppagasgnpgtdgi pgakgsag  
appi agapgfpprgppppqgagtpgl gpkqqtgeppi agfkgeqqpkgeppagppqgappageegkr ga  
rgeppgvpi gppgergppnrgfpgqdg l agpkgapgergppgl agpkgangdpprpepgl pgargl t  
grpgdagppqkvpsgapgedgrppppppqargqppgvmgfpgpkgangeppkagekgl pgapgl rgl pg  
kdgetgaagppppagpgergeqqpagspfgql pppppppgeggkpgdqgvpeagapgl vpprgergf  
pgergsppaagl qpprgl pgtgtdgpkgasppppgaqpppgl qgmpgergaagi agpkgrgdvgek  
gpegappkdgggl t gpi gppppagangekgevgppppagsagargapgergetgppppagfagppgadg  
qpgakgeqgeagqkdagapppqpsgapppqptgvtgpkgar gaqpppgatgfpgaagrvgpppsngn  
pppppppppsgkdgpkargdsgppgragepgl qppagppgekgeppgddgppsgaegpppppgl agqrgi v  
gl ppprgergfpgl pppsgppkqgappgasdrppppvpppgl tppageppregspgadpppprdgaag  
vkgdrgetgavgappppppsppagptgkqgdrgeagaqppmppsppagargi qpppppprgdkgeage  
ppgerl kghrgftgl qgl ppppppsgdqgasppagppppppppvpppsgkdgangi pppi gpppprgs  
getgpapppnpppppppppppgpi dmsafagl gprekdpdl

-----qymradqaaggl r qhd  
aevdatl ksl nnqi esi rspegrknpartcrdl kl chpewksdywi dppnqct l damkvfcmetget  
cvypnpanvpkknwsskskekhi wfgeti nggfhfsgygdnl apntanvqmtfl r l l stegsqni tyh  
cknsi ayl deaagnl kkal l l qgsndvei raegnsrftytal kdgctkhtgkwgkvti eyrsqktsr l pi  
i di apmdi ggpqefgvdi gpvvcfl

gl y\_unwei ghted\_fasta. fasta

>'Homo sapiens (human)' type III alpha 1  
mmsfvqkgswl l l al l hpti i l aqceaveggcshl gqsyadrdrvkwpepcqi cvcdsgsvl cddi i cddg  
el dcpnpei pfgeccavcpqptaptrppngqppqgpkgdppgppi pgrngdpgi pggpgspspgppgi  
cesc-----

-----ptgpqnyspqydsydvksgvavvgl agypgpagpppppppgtsg  
hpgspspgyqgppgepgqagpsgppppgai gpsgpagkdgesgrpgrpgergl pppgi kgpagi pgf  
pgmkghrgfdgrngekgetgapgl kgengl pgengapgmprgapergrpgl pgaagargndgargsd  
gpppppppgtagfpgspgakgevgpagspsngapqrgpqpqghagaqppppppi ngspgkgemg  
pagi pgapgl mgargpppagangapgl rggagepgkngakgepprgergeagi pgvpgakgedgkds  
pgepgangl pgaagergapgrfpgapngi pgekpgagergapppagprgaagepgrdgvppgmrgmp  
gsppggsdkgpppsqgesrpppppsgrgppgvmgfpgpkgndgapgknger gppppppppppg  
kngetppppppgtgppgdkgdtgppppqgl qgl pgtgpppgengkpgeppkgdagapppgkdaga  
pgerppgl agapgl rggagpppeggkgaagppppgaagtgl qmpgergl gspgkdkgeppg  
gadgvpkgdgrgptgpi gpppagppgdkggeggapgl pgi agrgspgergetgpppagfpgapng  
epgkgergapgekgeggppgvagppgsgpagppppqgkgergsppggaagfpgargl ppppsngn  
pppppsgsdkgppppagntgapsgvsgpkgdagppgekgsppaagppgagpl gi agi tgargl a  
gppmpgprgsppgkvkgesgkpgangl sgerppppqgl pgl agtagepgrdgnpsdgl pgrdgspp  
gkdrngensppagppgppgvpagksdrgesppagpagppagsrgappppprgdkgetge  
rgaagi kghrgfpgnpgapsppagqgai gspgpagprgvpgsppgkdgtsghppgi gppprgpr  
gergsegspghppppppppgagpccgvgvaaai agi ggekag-----

-----gfapyygdepmdfki nt  
dei mtsl ksvngqi esl i spdgsrknparncrdl kfchpel ksgeywdpnqgckl dai kvfcnmetget  
ci sanpl nvprkhwwtdssaekkhvwfgesmdggfqsygnpel pedvl dvhl afl r l l ssrasqni tyh  
cknsi aymdqasgnvkkal kl mgsnegefkaegnskftytlv edgctkhtgewsktvfeyrtrkavr l pi  
vdi apydi gpdqefgvdvpgvcfl

>'Mus musculus (house mouse)' type I alpha 1  
mfsfvd l r l l l l gatal l thgqedi pevsci hngl rvpngetwkpevcl i ci chngtavcddvqcneel  
dcpnpqrregeccafcpceeyvspnsedvgvegpkgdppgpprgrpvpppprdgi pggpgl pg-----

-----pppppppppppgl ggnfasqmsygydeksagvsvpmpgmpgprgl pg  
ppgagppqgfqppgepgpessgpmprgppppgkngddgeagkprpgergppppqgargl pgtagl  
pgmkghrgfsgl dgakgdagpagpkgepgspgengapqmgprgl pgergrpppgtagargndgavgaa  
gpppgtptgppgfpavgakgeagppqargseppqvrgepppppagaagpagnpgadgppgakgang  
aggi agapgfpgargpsppqpsgppgkngsgeppagpnkgdtgakgepgatgvqppppageegkrga  
rgeppsgl pppgergppgsrgfpgadgvagpkpsgergapppagpkgspeagrpeagl pgakgl t  
gspsppgdgktppppagqdrpppagppgargqagvmgfpgpkgtagepgkagergl pppgavgpag  
kdgeagaqgappagpagergeqppagsppgfqgl pppagppgeagkpgeqgvpgdl gappsgargergf  
pgergvqppppagprgngapngndgakgdtgapgapsqgagpl qmpgergaagl pppkdrgdagpk  
gadgspgkdgargl tpi gpppagapgdkeagpsppppgtgargapdrgeagpppagfagppgadg  
qppakgepgdtgvkgdagppppagppppgi gnvagppkprgaagppgatgfpagaagrvpppsgn  
agppppppvkeggkprgetgpagrpgevgppppgpagekgsppgadgpagspgtppqgi agqrgv  
gl pqrgergfppl ppsgepgkqpsgssgergppppmpppl agppgesregspgaegspgrdgag  
akdrgetgpagppgagppagppvppagkngdrgetgpagpagpi gpagargpaggpprgdkgetge  
qgdrgi kghrgfsgl qpppspspsgeqpsgasppagpppsagspgkdgl ngl pppi gppprgrt  
gdsgpagpppppppppppppsgydfsfl ppppkeksqdggr-----

-----yyraddanvvrdrdl  
evdttl ksl sqqi eni rspegsrknpartcrdl kmchsdkwsgeywi dnpqcnl dai kvycnmetgqtc  
vfptqpsvpqknwyi spnpkekhhvwfgesmtdgfpfeygsegspadvai ql tfl r l msteasqni tyh  
cknsaymdqqtgnl kkal l l qgsnei el rgegnsrftystl vdgctstgtwtgktvi eykttktsr l pi  
i dvapl di gapdqefgl di gpacfv

>'Mus musculus (house mouse)' type II alpha 1  
mi r l gapqsl vl l tl l i aavl rcqqdaqeagscl qngqrykdkdvkpscri cvcdtgnvl cddi i ce  
dpdcl npei pfgeccpi cpadl atasgrkl gpkqkgepgdi rdgagpprgrdgepgtgnpppagp---

-----pgpppppgl sagnfaaqmaggydekaggaqmgvmqgppmmpgprgppg  
pagagppqgfqgnpgepgpvsppmprgppppagkpgddgeagkpgksgergl pppmgarfgpgtpl

gl y\_unwei ghted\_fasta. fasta

pgvkghrgypgl dgakgeagapgvkgesgspgengspgmpgrgl pgergrtgpaagaargndgqppga  
gppgpvpgagppgfpagpagkgeagptgarpegaqgsrgepgnpgspgpagasgnpgtdgi pgakgsag  
aggi agapgfpgprgppgpgqatgpl gpkqagepgi agfkdgqpkgetgpapqpagppageegkrga  
rgepggagpi gppgergapgnrgfpgqdl agpkgapgergpsgl agpkgangdpgrpgepgl pgargl t  
grpgdagpqqkvpsgapgedgrppppgqgarqppgvmgfpgpkgangepgkagekgl agapgl rgl pg  
kdgetgaagppgspgagergeqgagppsgfagl pppppppgeggkqgdqi pgeagapgl vgrgergf  
pgergsppaagl qprgl pgtpgtdgpkgaagpdgppgaqppgl qmpgergaagi agpkdrgdvgek  
gpegapgdggrgl tgpi gppgpagangekgeagppgsgstgargapgepgetgppgpagfagppgadg  
qqgakgdqgeagqkdgadagppqgpgspgagppgtgvtgpkgarqaqppgagtgfpgaagrvgppgan  
ppagpppgagkdgpkgvrgdsgppragdpgl epgapgekegpgddgpsgl dgppppgl agrgi v  
gl pqrgergfpgl ppsgepgkqgagpgasgdrppgpvppgl tgpapeggregspgadgppgrdgaag  
vkgdrgetgal gapgppgspgpagptgkqgdrgeagaqgmpgspgpagari agppgrgdkgesge  
qgergl kghrgftgl qgl pppppsgdqgasgpagpsgrppppvpsgkdgsgni pgi gppgprgrs  
getgpvppgspgppppppppgi dmsafagl qprekdpdm-----

-----qymradeadstl rhd  
vevdatl ksl nnqi esi rspdgsrknpartcqd kl chpewksdywi dpnqgctl damkvfcmetget  
cvypnpatvprknwsskskekhi wfgetmnggfhsygdgnl apntanvqmtfl rll stegsqni tyh  
cknsi ayl deaagnl kkal l l qgsndvemraegnsrftytal kdgctkhtgkwgktvi eyrsqktsrl pi  
i di apmdi ggaeqefgvdi gpvcfl

>'Oncorhynchus myki ss (rainbow trout)' type I alpha 1  
mfsfvdi rll alll satvll argqgeddrtagstcl dgqfyndrdvkwpepcqi cvcdsgtvmcdevi ced  
tsdcpnvi phdecpci cpddgfqepkvegpgqdrgakgepgpagfpgndgi pqqpl pppp-----

-----ppppgl ggnfspqmsggfdeksggmsmpgmpgmpgrppp  
ppgssgppqgftgppgepgeagssgmpgrpagppgkngddgesgkprpgergasgpggargfpgtpgl  
pgi kghrgfsgl dgakgesgpagpkgeggasgengaagamgrgl pgergragpngaagargndgaagaa  
gppgptgpagapgfpgppgkgevgaaqgarggegpqsrgaenpgpagaagpagngadgnpgtkgapg  
ssgi agapgfpgprgppgpgaggagppkngtgevngakgeagakgesgpagvqppagpageegkrge  
rgepggagargapgergapsrgfpgsdgasgpkggpgerggagvagakngtgepgrngepgmpgskgmt  
gspgspgdgktpgsagggdgrppppgvargppgvmgfpgpkgaagegkpergvmgpgsavgapg  
kdgdvgapgapgvagpsgergeqgagppgfagl sgpqgai getgkpgeqgl pgeggapgsagsrgdrf  
pgergappsgpagarspsagndggkgeagaagapggqppgl qmpgergaggl pgl kgdrgdqgvk  
gadgaggkdgvrgmtgpi gpngpagspgdgetgapgavgpgsargapgergesgagpagfagppggd  
qqgakgeagdnakgdggaqppagptgapppqpagntgakgargaagppgagtgfpgaagrfgppgsgn  
ngppgtppgggkegqkngretgpagrpgel gaagppgpkgekqppgddgngpsgtppqgi gqrgi v  
gl pqrgergfpgl aggl gepkqppgpfgerppgmpppgl agapgepgrtppnegssgrdgaag  
pkgergesgvagasgappppgpagvpgksgdrgesgpagagi agpagprgspgpagargdkgesge  
agergmkgghrgftgmqppgpgsgsgesgpagaprgpsgsagaagkdgmsgl pgi gppgprgrs  
gemgsgtppppppppppppggfdmgfi aqpaqekapdfr-----

-----hfraddanvmrdrl  
evdttl ksl sqqi eni rspegtkknpartcrtl kmchpdwksgeywi dpdqgctq dai kvycnmetgetc  
vypteadi pkkswytskni kekhhvwfgeamtdgfqfeygsegsnakdvni ql tfl rll mateasqni tyh  
cknsi aymdqqsgnl kksl l l qgsnei ei raegnsrftysvtedgctsthtgawgktvi dykttktsrl pi  
i di apmdvgapnqefgi evgpvcfl

>'Oncorhynchus myki ss (rainbow trout)' type I alpha 2  
ml sfdnrllll avtsll ascqs-----ggk kgprgakprgdrppqgnrdgkagl pgi agppppp  
l ggnfaaqfdggkgsdppgmpgl mgsrgppngppgagppqgftghagepgepgqtsi gargptgsagkp  
ge-----

-----dgnngrpgkpgdrppgtqgargfpgtpgl  
pgmkghrgyngl dgrkgesgtagakgetgahgangsppagsrgl ngergragpagpagargadgstgpa  
gpapgl gaagppgfpgapppkgei ggagsngpsgppggrgepgi ngavgpvgpvgngngi ngakgaag  
l pgvagapgfpgprgppgppqgstgargl gdpgsgqkdgsgakgepghsgvqgaagpageegkrge  
tgevgtgpagl rgarggagtrgl pgl egrgpi gmpgargatppgi rgapgdagragesgl tgargl p  
gnsgqggppgkegppgaagl dgrtppppgtgprgppni gfpgkpggeagkggdkgptgatgl rggp  
adgnngapppagvvgntgekgeqpagapgfagl pppagpageagkagnqgmpgdqgl pppagvkgern  
sgpagsagsqgai gargpagtppdggkgepgsvgi vgaaghqppgmpgergaggtppkgekgegggr

gl y\_unwei ghted\_fasta. fasta

gl egnmrgdgarppgppsgpppsgangekgesgsfgpagpagl rgpsgergeggpagl pgfagppgsdg  
qsgprgekgpaggkdvvpagpagppsgqsgpsgasgpagppggrgdagpsgl tgfpgaagrvgppgpagi  
agppgsagpagkdgprgl rgdppgppqgeqqvvpagi sgdkgpsgesgpppaggtagppgvl gpsgfv  
gl pgsrgdkgl pggpgavgeprl gpagasprgpagni gmpgmtgtqgeagregnsngndgppgrppaag  
fkdrgeppsgal gssgppgngpagsagrppnr gesgptngggpvavgar gappagprgekggage  
kgdrmgkgl rghggl qgmpgngpsgetgsagi tgpagprgpagphgppgkdgragghgai gpvghrgsp  
ghl gpagpppsgl pppagpaggydqsggydeyradqpsfra-----

-----kdy  
evdati ksl nsqi enl l tpegscknpartcrdi rl shpdwssgyfiw dnpqgci adai kaycdfstghtc  
i hphpesi arknwy--rssenkkhwfgeti nggtefayndetl spqsmatql afmrl l anqatqni tyh  
ckns vaymdgengl kkal l qgsndvel raegnsrftfnvl edgctrhtgqsktvi eyrtnkpsrl pi  
l di apl di geadqefgl di gpvcfk

>' Oncorhynchus myki ss (rainbow trout)' type I alpha 3  
mfsfvdi rl al l l saavl l argqgeddsgfgscsl dgqyndkdvwkpepcqi cvcdsgtvmcdevi ced  
ttdcadpi i pdgeccpi cpddsesedpql pegppgppggdgpkgddgpegvpgndgvdgppgl -----

-----pgppppppppgl gggv fspqmhhgydqkssggqaqmqmmpmprgl ag  
ppgntgppghhggpgepgeppgsgpmger gamgphgkngdngpgrsgrpgergsagppggrgtptgpl  
pgi kghrgfngmdgakdggpagpkgeggspgssngsgamgargl pgergrppagssgargndngsgpa  
gsngptgpsgagpfpaggakgetgpqggrgsdgpqgsrgeppnppagaagpsgapggdggaggkgs tg  
aagi sgapgfpgtrgpagppsgggngpkgnhgehgaqqpkgepgvkgepgsagppgppggsgeegkr ga  
rgeppgaggvppgergmpgmrgfpgsdgaaggkggppgergangpmaagga teagrppgeppmgskgmt  
gspgspgpdgkvpagvtgndgrsppgssgargqppgvmgfpgpkgppgdngkppergeagavvggl gapg  
kdgdsgapppqgpagsgqekgeggpagpngfql pgtqgatgepgkageqqgpggevvgppgsgsrgdrgf  
pgerggi gsagpagprgangspgndgargesgaagapggmgapgl qgmpgergsngsgakgergdggpk  
gadggpgkdgmrgmtgpi gppgptgahgekggggl gppgptggrgsppgergehgapppagfagppgadg  
qpknkgetgnngpkgeagapppgppvgapppagpagnsgtkgtrgapppgasgmpgppggrvppggsa  
pgsagpppagkegqkgrgetgi agrpgeagaagppgsgasgakngdgmgapgtppgppi agqrgi v  
ggppgrgpsgtagi pgtagepgkqppgppvgergsppmppgl sgapeagregstghdgvsgrdgppg  
pkdrgengnagsppagppgagppsgasgktsr gesgpagpagnppagrggl gpagargdkgeage  
ggerghkghrgl ngmpgl ppspsgesgpagl ngpsgrgphgssgstgkdgmngl pgpi gppgprgrn  
gkmaagapgspl pppppagggfhvapi ynqekgpdpmrggg-----

-----yhyradepdmmnrgdm  
dvdttl ksl sqkveni rspegsqknparmcrdi rmchpewksqyvw dnpqgspl davqvycnmetgetc  
vyqsqdtvpmknwytskni rekkhwfsesmdngfqqfygsegsnpedvni ql tfmrl msneasqnvtyh  
cknsi ayndeatgnl kkal l l qganei ei raegnsrftysvsedgctsthtgtwgktvi dyktsktsrl pi  
i di apmdvgapdqefgvevgpvcfv

>' Paralichthys olivaceus (bastard halibut)' type I alpha 1  
mfsfvdl rl al l l saavl l vraqgeddraggscti dgqvfadr dvwkpepcqi cvcdsgtvmcdevi ced  
ttdcpnvi phdecipi cpddgfqdsqvegpkgergpkdrgl pppgndgi pqqngl ppppg-----

-----pgpppgl ggnf spqmsggyddks-pgmsvppgmppmprgppg  
pagssgppqgftgppgepgeagasgpmprgaagppgkngedgesgkpprggergppsgppgargfpgtgpl  
pgi kghrgfsgl dgakgdsgpagpkgeagtpgengtpgamgprgl pgergrtgatgsagargndgaagaa  
gppgptpagppgfpgppgakgeggpqsrgpegpagar gepgsagpagaagpagnpgtdgapgakgl pg  
sagvagapgfppgrppgaggaagatgpkngtgeagapgakgesgakgesgvagvqppgppgsgeegkr ga  
rgepgaagvrpppgerggppgrgfpgsdgsagakgapgergapgl l gpkgstgepprtgeagl pgakgmt  
gspgspgpdgkmaagapqdgprppgsvgarqppgvmgfpgpkgaaageggkppgergvmgptgpvgapg  
kdgdvgaqqpsgppagergeqgaagppgfql pppqgavgetgkppgeql pgeagatgpagargdrgf  
pgergapi ngpagarpsppsgndgakgdagapagaagppgl qgmpgergsagl pgl rgdrgdqgak  
gadgagpkdgrgmgtagi gl pgaagatgdkgeppaggi vppagargppgergesgpppagfagppgadg  
ppgakgeagdngakgdagppgsgptgaagppgppvngtgpkgargpaggppgatgfpgsagrvgppgsgn  
agpagppgatgkegqkgrgetgpagrpgemgaagl ppsgekgnpgeagppgssi pppqi nggrgi v  
gl pqrgergfpl ppsgevgkhgppngngppmppgl agappeagregapgnegsagr dgaag  
pkdrgesgpagasgppgagppvpagksdrgesgpagpagsagpagprgpagapgl rgdkgesge  
agergmkgghrgftgmqppppagasdqqpagaagpgrgppsagsagkdgmngl ppgtgpppgrgrs  
gemgpagpppppagapagppggfdl gfi aqp-qekapdpyr-----

gl\_y\_unwei ghted\_fasta. fasta

-----mfraddanvl rdrdl  
evdstl ksl sqqi eqi rspdgtrknpartcrdl kmchpdwksgeywi dpdqgctq dai kvycnmetgetc  
vspsqrevakknwyvskni kek khvwfgeamndgfqfeygsegsapedvni qmtfl rl msteasqnvtyh  
cknsvaymdasvgnl kkal l l qgsnei ei raegnsrftysvl edgctshgtwtgkvti dyktsktsrl pi  
i di apmdvgapdqefgl evgpcvfl

>'Paralichthys olivaceus (bastard halibut)' type I alpha 2  
ml sfvdtri l l l l avtsyl ascqs-----mgprgdkgprgdr gpkpdpdndgkpgl ppppppppppp  
l ggnfaaqydgskgpdagppgmimgargppppppppppqghtghagepgepggtgal gprgpppppgka  
ge-----

-----dgnngrpgkpgdr gapvqgargfpgtpgl  
pgmkghrgygtl dgrkgepgsagakgesgahgaagspgl agsrgmagergragpagaagar gadgnvga  
gpsgpl gaagppgfppgppkgei gpagatgpsgaqgsrgepgangavpvpgagnppangl ngakgaag  
tpgvagapgfppgrgppppppqgaagprgl agdpgaqqvkgdggpkgepgnsppqgspgphgeegkrgp  
tgepgatgpagsrgargaagsrgmpgaegrtgpvmppgargstgsggprgppgdagragepgsagl rgl p  
gspgssppgkegpapagqdgrtgp ppptgprgppgni gfppkgasgeagkpkgekgatgptgl rgtpp  
pdgnngatgamppagppgekeqgppsgapgfqgl pppagaageggkpgdr gi pddqgl apgakgergi  
ngvagasvqgavgar gpapagppdgskepgi tgaaggpghgppgmpger gaagapggkgekeggghr  
gpegnagrdgarmppagppgtgangdkgesgfgpapgprgasgergevgpagapgfagppgadg  
qpgargergpagi kgevpspsgpagqsgpagnppagppgargdngpsgl tgfppagrvgtpgpagi  
vgppgptgaagkdgprgprgdvpgggsgeqgmvgppgvgekppsgesppgagpagtggpl gl qgfv  
gl pgar drgspggaggl gepgrvppppsgargppgni gl pgmtgpqgeagregnpndgppprgpagp  
fkgrgepppagamgl agappagpsgaagrppnr gesppgaagsvppagargaagpagsrgekvgvgd  
kgergmkl rghpgl qgmpgspgsgdtgaagpagssgprgpagphgpagkdgragghgti gspgarpp  
gyvgpapppppgl pppagpsgggydvsg-ydeyradqpal ra-----

-----kdy  
evdati ksl ntqi dnl l spegsrknpartcrdi kl shpewssgyfiwi dpnqgcsndai kvfcdfttretc  
i yahpesi arknwf--rsteskkhvwfgeti nggtefayndetl spqsmatql afmrl l snqasqi tyh  
cknsi aymdgergnmkkavvl qgsndvel raegnsrftfsvl edgctthtgewskvti eyrtnkpsrl pi  
l di apl di ggadqefgl di gpcvfk

>'Rana catesbeiana (bullfrog)' type I alpha 1  
mfsfvdtri l l l vi aati l vakcqeddl gysgcvvdgrtyndkdvwkpeacqi cvcdeg ti l cdevi ced  
i gdcnppei pmgeccpvcgeggyqtgsvvegpkggetgprgergppgagprdgi ppppgi ppp-----

-----ppppppagl ggnfapqmsygydeksagi smpgpmgpmgprgppp  
psgspgppqgfqpppgepgepgaagamgprgppppgkngedgagkpprgergppppqgargl pgtagl  
pgmkghrgfngl dgakgdtgpagpkgepgnpgengappqvgrgl pgergppgspgpagargndgtpgaa  
gppgptgptgppgfppgvpgkdagppgsrgpdgppgar gepagppagpagsagnpgtdgqpgakgatg  
apgi agapgfpgargapppqppgspgpkgngepgaagkngepgakgesgpagsgppppppgeegkrgs  
rgeppsgppppager gapgsrgfpgadgaggpkppgergvpvsagpkgspsgesrppgepl pgakgl t  
gspgspgpdgktpagapggdgrppppppgargqsgvmgfpgpkaagepgkppgergvagppgavgapg  
kdgeagaqpppppagpgergeqppagppgfqgl pgsppaggesgkpeqgagpdvpsgpagrgergf  
ppergai gpppppprgangapndgakgeagapagppgppsgl qgmpgergaggl pgakgdrgdqgpk  
gadgapgkdgvrgl tgi pppppgagpdgkeagpagpagptgsrgapgergepppsgpagfagppgadg  
ppgakgeqgdagpkgdagppgaagptgapppagavgatgpkgar gpagppgstgfpgaagrvgpppsgn  
agpppsgpagkegqkprgetgpagrppgepgaagpppsgekgspgsdgpagapgi ppppgi agtrgtv  
gl pqrgergfpgl ppptgepgkqgssgspgergpppsgppgl agppgeppregspgsegspprdgsag  
pkgdr gesppagppgagpagppagpagkngdrgetgpagpagpagpagargpsppagargdkgeage  
qgergmkgghrgfndl pppppagphageqppsgasppagprpppgssgspgkdgsgnl ppgi gppppgrt  
gdvpgappppagppppppppgggfdfsfmpqppqeksh-----

-----hyraddanamrdm  
evdttl ksl skqi eni rspegtrknpartcrdl kmchsdwksgeywi dpnqgctl dai kvfcnmetgetc  
vyptqsti dqknwyi snnprek khvwfgetmsdgf qfdygsegsdpadvni ql tfl rl mateasqi tyh  
cknsvaymdqetgnl kkal l l qgsnei ei raegnsrftysvi edgctqhtgqwgkvti eyktpktsrl pi  
tdvapmdi gapdqefgvei gpcvfv



gl y\_unwei ghted\_fasta. fasta

>' Rana catesbeiana (bullfrog)' type I alpha 2  
ml sfvdl rsvl l l avtl yl vtcqevrrgprgdkgppgeqgppgi pgrdgedgl pgl ppppgvpgl ggnfa  
aqydpksaepgq-----qgi mgprgppgppgspsqgfqgl pgengepgqtgpvgsrgpsgapgka  
ge-----

-----dghpgksgrpgergpvpgqgargfpgtpgl  
pgfkgi rghtgsdqkqgapgaagvkgengangdngsppqagargl pgergri gpagsagsrgsdgssgpv  
gpapgi gsagapgl pgapgakgel gpagnngptgaaggrgepppgsl gpagppgnpgtngvngakgtag  
l pggvgapgl pggri pppagpagpsgargl agdpgi agkgdtgskgepgsvqqppagpsgeegkrpp  
ngeagssgpsnagi rgvpgtrgl pppdgraggi gpagsrgssgppgargpndagrppgepl l gargl p  
gfsngppqgkegpapqgi egrsgaagpagargepgai gfpgpkgpngepgkngdkngqgsgnrgap  
pdgnngaqqpagl ggatgekgeqgppsgapgfqgl ppppppgevgkppgergapgdfgppgsagtrgerga  
pgeggagphgpsgrpsgagppdgqkgeppaagl nggl gpsgpagi pgergtagtpgtkgekdgagns  
gdygnpgrdgargpagaagapppagppgdr gesgpagpsgvagprgapergeagpagptgfagppgaag  
htgakgdrgakgpkgeagsppgl gahgsagpagnpagstgargdagpsgatgfpagragagppppgn  
vgpsgptghpgkdgsrgprgdsppvgrpgeqqghgpvpl agdkgpsgeagpappgaagpsgl gargl l  
gl pgrtrgergl pppgngnepgpgsl agssgprgppgsvgspgvghsgeagr dghpndgppgrdgl pg  
akgergypgntgpgsl agapgpagsagpagksnrgeggpsgpagi tgpsgprgpagppgvr gdkgeage  
rgargl dgrkghngl sgl pppsgtpgetgpgsgvppvgrgpgsgpsppgkegrsghpgamgpvgrgpa  
gftgpagppppppghagpsgggydggdgyeyradqperkp-----

-----kdy  
evdatl ksl nqqi evi l tpegsrknpartcrdl rl shpewtsgfywi dnpqgctsdai rvfcdffssetc  
i hanpdei tqknwyi ntsnkdkkhl wfgei l nggtqfeyhdegl takdmatql afmrl l anqasqni tyh  
cknsi aymdeetgnl kkavi l qgsndvel raegntrftysvl edgctkhtgewgktvi eyrtnkpsrl pi  
l di apl di gghdqei gfei gpvcfk

>' Shrimp white spot syndrome virus' collagen  
mayi dqgafgaksvmqqqyl l ppsnr l skqqpl asssl qpssnkprstsrvt di fvvi tcvvl i aafi  
snsfsvtknvkl skeqteki l ekdl pdkvykl fenl kdgtfgi gedeeereergegeeel etkni rl k  
rkwkemteqgdqgi kvrl hgrgergetgpagavgpapqgergai gpagkdgavgpapqgergai gp  
agkdgavgpqppgergengrpprdgavg-----

-----ppqgergai gpagkdgavgpqgergai gpagkdgavgpapqg  
ergengrpprdgavgpapppgergai gpagrdgavgpapppgergatgi pgrdgvdgsvgppgergei gr  
pprdgavgpappprrgatgragkdgavgpapqgekgeagkdgsi gpqgi qpprgetgpprdgtaer  
gergfppppgetgppgkdgvdgsegppqkrgetgpvpprgepl agl pgrdgai gpagppgergatgl pg  
rngvdgsi ppqrrgatgragkdgavgpapppgergatgi pgrdgvdgsvgppgergetgpagrdgsvgp  
agppgerengrpprdgatgi gpagppgekengrpprdgatgi pprgetgamgkngvdgsmgppgrr  
gatgragkdgavgpapppgergetgpagrdgsvgpapqgetgl tgspprdgatgi gpagppgekeng  
pprdgatgi gpagppgekengrpprdgatgi gpagppgetgl tgrpprdgatgi pprgetgamgk  
ngvdgstgpprrgatgragkdgavgpapppgergengrpprdgatgi gpagppgetgl agl pgrdgai  
gpqgekengrppkdgatgpmppgergetgi gpagppgatgl pgrdgvdgsvgppqkrgl i grtgrdg  
ai gpvvpagpkgetgl agl pgi dgkdgsvgppgai gpi pprgergetpprdgedgstgpmppqgl rga  
tgappqgergl kprgkdgetppprqrdgi mgprgl rkegapndgl egpegrdgapppagpi ppq  
gi rgl kgi qgrpprdgemppagkdgi egprqdggtgagkprgl rfgqgrtgetgaqgsrgekdrgl tg  
pprdgppgeegppgl rgergpprpprgi rrgspqgsngvqpprpprgtkgrtgi qgl tgi egprgp  
rgi qgkegrmgki ghrgekgdkgdrgeqgi agadgekpprgl rgi rgpi gapgkpgtegvrgprgvr  
gypgaqgel ppqptgppppagppppmgtgdtgpmppgavpprgekgrgkngpkgadgkdavni  
i qkysi thara-----ei mwegnei geayi grsygttdi pvmi enri gmtned  
kkneyci qvmtmhsi ttrgrtsgvfvsnktdy l l vt l l mpesvscrt dvstnarservnavreresk  
yrfi rpsdqsi gthsrski avmypoasmsysvdtl dadvarrettsvl l l aeti hgekdrgyadrgrtv  
grl mvppteel l vl qadpdi tpti adpi tvaevgnpvvri ktpscdel nkfmgfstnfsfl kyvkrfma  
qassnsrndmsafl l dl i fekl i efl l stgwnreal ggttgai l mi rtatcr l aqsyyp l petvgmdfl  
qtpgfdyksl pnneryi yefqatm

>' Streptococcus equi ' collagen  
mi nkrkkkl i yrygvcsaavi l aal asl gtckeakal sgppgypl trdfsrnfl eentakyl dql rehl q  
hrf sel esl trkl ekeggtrgpappppagpkgergeppvgpmpprgeqqpkl dgargpegqqgkppg  
vgppppagpagkgetgpppprgdkgtgetgkqppagergpapppgprgdkgengapgeqgpi gpkget  
gpkgdkgergekdgqqrgekdgqqrge-----





gl y\_unwei ghted\_fasta. fasta

-----I ygdnpnagkts  
krytkedl kkdetafeal vei geai eafknptgtraapartckdl al ahpemedgvyvwdpnqgspi dai  
evychi kthqtcvfakpsqvfkgsywsgpqkyvwfgedmdngfqfkykadrvqmtfl ql l steayqni ty  
hcqnsapfynmqtqstdnaakfmtsndl el qanhkkftysvkl decqyki kkwasttfefrttktrrl pi  
l di apydi ggpdaqafgl ei gpvcfs

>' R i f t i a p a c h y p t i l a ' c o l l a g e n a l p h a c h a i n  
yragpryi q-----

-----aavvpi gprgppppgsppqqyyqgl r  
gepgdsgpmgpi gkrppppagi agksdgdgrdgepprggi gpmgprgaggmpgmpgpxghrgfrgl sg  
sxgeqgksgnqgpdggppagpsgpi gprgqtgergrdgksl pgl rgvdgl agppppppgi gstgspgf  
pgtpgskgdrqsgl xgaqgl qgpvvl sqppgvagenghpgmpgndgangepgasgesgl pgpsgfpgpr  
gmpgtagsppqagaxgdggptgeqgrpgagpvxgssgppgdvgapghageagkrsgpsgppagsgppqg  
drgl pgsrgl pgmtgasgamgi pgekpsgepgakgptgdtgrqgnqgtpgi agl pgnpsdgrpgkdgr  
pgi rgkdgkqgeqppqppgl agl qragppgargepgkngapgepgahgeqgdagkdgetgaagppgaa  
gptgargppgprgqqgfqgl agaagtpgeagktgergavgatgpsgpagppgergapdrgnvgrmpg  
ergatgpagptgspgvagakgqgppppagl vgl pgergpkgvvgsxgsrgdi gprgkagergkdgerge  
rgengl pgpsgl aasxgergdmgsppgergsppagergpagsqi qgppppgdagpagtxgdi gfpger  
gtrgatgkqgargprgl agkrgl rgaggsrgetgaqgei gl pgsppqgl pgpsgpppsgpagtagkqg  
vxgargspgl vgkqgdrgsdgepprdgtxgergedgppgvsgptgapgqqgergmpgmvgi rgetgpmgg  
qgmxdggpppsgdrgergnagppgptgpsgqagapggqegapgdgl pgl agrpgergepgvagragsq  
gl agl mgqrgl pgaagppgdrgergeaggqvqgppvgapgsqppagi mgmxgeaggkaxgdkgw-----

-----tgl pgl qgl qgtpghsesgppgagprgar geaggrgsqppgkdqppgsgrvgrgps  
gddgrsgppppppppppnsdyga

>' E p h y d a t i a m u e l l e r i ' f i b r i l l a r c o l l a g e n  
mgp-----

-----ppngapanpvppppppgagdpfsgl dgk  
ngkpgnqgprgdtgppgsvgnagl pgapai mppgffdpkgpapel sgvkargspgl sgpsgpagprgdh  
gdtgqpgi pghpgnqgaggi l qppgvpgvpgdtgpmgl pgvppgdgmpgqgsggqsfkgpl gpkgtvg  
dqsqgdagppgaqgdqrrgappgakggvgal grpsagai gl pppageagpagtgpagpkgakggkgl  
vgppgl pgl agppgdqgdagstgl tgappagl ngrdgapgdgl ngasgsi gi tgdi gl tgdaysgpi  
gpnvppppppgdtgal qppgatgapgkegakqvfgppagpdrgl qgdmgmkgvkgesgdmgpagpag  
vi gapgmkgppgkpgi pgl dgrl gakgtpgsnpprgpi gl pgvpgvdgkagaagapgvtagpkegrpgs  
tgl sgaageppdgvgqsi gdtgsagpvgapgl tgptgskgpagaegtppmpgaagpagvtgdhgnvgqq  
gpegprgpagptgppgi vgvpgdqqdvgvppqagaqppsgpagdvdrgl qgeagdagl pggsgqpgl pg  
epgkegpnqgeagdnppqgaagepgl pgpvpl gapprgadgi agdagvpgi agl kgppppgnrga  
l gpqgyqppppppppgpi gnrgpi gpsgptgpagpvndgnqqppgvpl pgdagmagl sgpmgedgda  
gapypgeqgl pgtagl pspfa i qgdagaqgdqghppgi gapgatgpvpl pgi qvppngdvvpagptg  
pagl dgapgaqppdgepgl pgl pgsqsksgasgppgvppvgaagkpgsi rgppppppppgd l grpgerg  
akgvrtpgagpvdgvagi agai gfpgmpgdgaagpsgyppgfdgvagkppppgamgpkqgagerppgt  
pgtqgskgvvpgkvvppqgdsgdtgdagqkgargtagsvgaktvpl pgnqppqppagl kvvk-----

-----ekgevgdkgi l gpdgdkgptgmsgdagpagpi gdagi qppppqdgptgaqpprggqgkpg  
agavgdvgrgstgpagppppgt

# unweighted tree

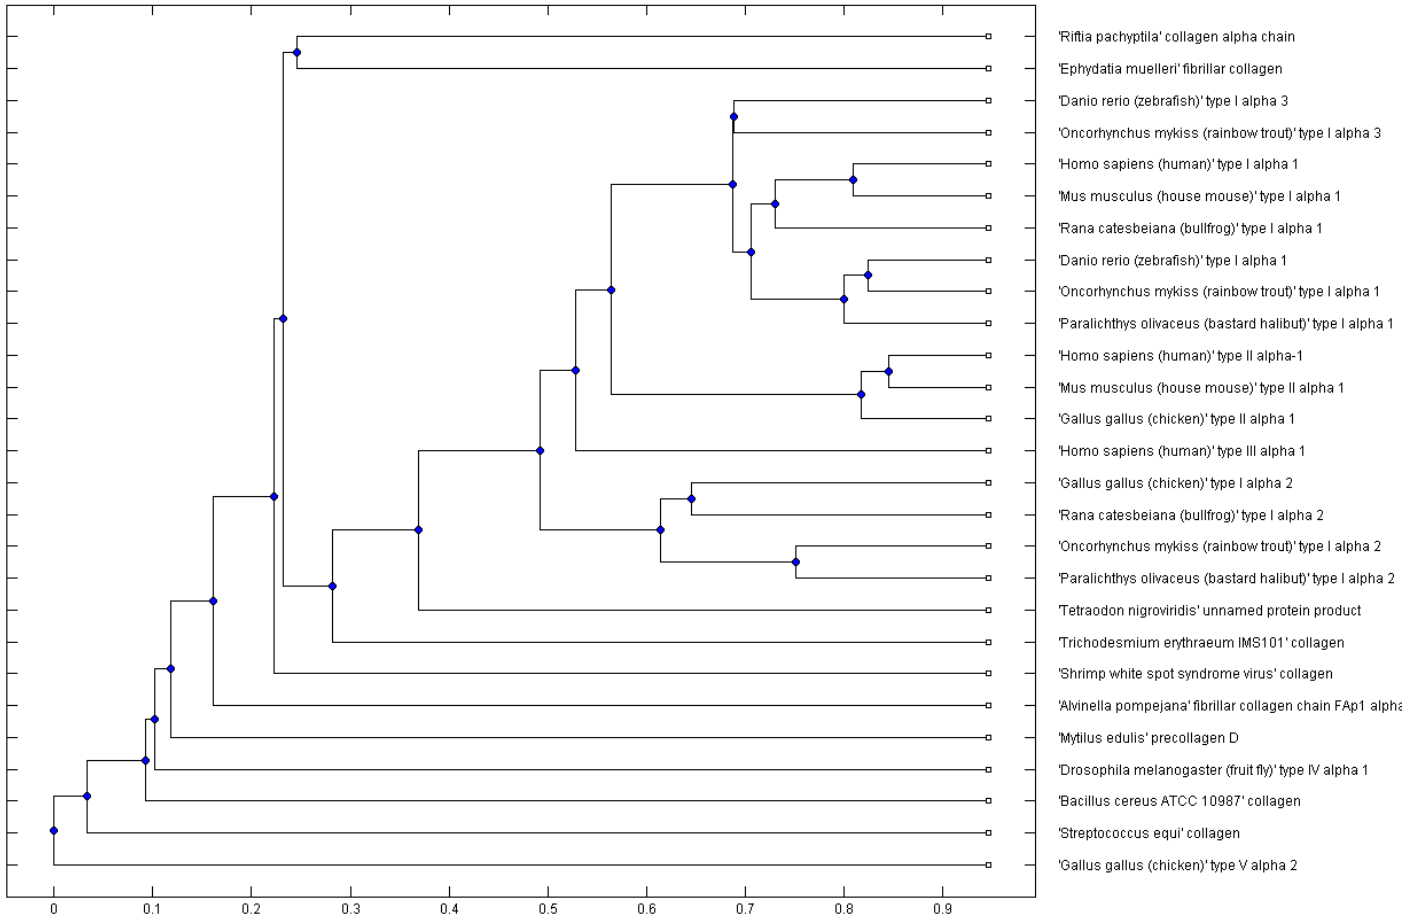

gl\_y\_wei ghted\_fasta.fasta

>' Bacillus cereus ATCC 10987' collagen  
mkerdkqnslnsnfri spnl i gptfppvptgftgi gi tgptgpqgptgpqgprgl qgpmgemgptgpqgv  
qqi qgpvgsi gatgpegqqqppqgl rqpqgetgatgpqgvqgl qppagptgatgaqqi qgi qgl qgpi gat  
gpegpqqi qgvqgl ppatgpqqi qgaqgmqgl qgpsngtgatga-----

-----tgqgi tgptgvtgptgi tgpsg  
pppgptgptgatgppggpsgstgatgatgntgatgstgvtgvtgvtgatgstgptgstgaqgl qgi qgi q  
gpi gptgpegpqqi qgi ppgtgvteqgi qgvqgi qgatgatgdqppqgi qqai gpqgatgatgdqppqg  
i qgvppsgatgpqgvqgl qgpmgdi gptgpegpegl qppqgi qgvppvgatgpegpqqi qgi qgpvga  
tgpqppqgi qgi qgvqgi tgatgvqatgi qgi qgei gatgpegpqqvqgaqqgi gptgpmgpqgvqgvq  
gi qgatgaqgvqppqgi qgi qgi qgi qgptgatgdtgatgatgeggtgptgvtgptgpsggpagptgptg  
psgpagvtgpsg-----gpppgptgatgatgvtgdtgatgstgvtgatgetgatgv  
tgi qgpqqi qgvqgei gptgpqgvqppqgi qgvtgatgdqppqgvqppqgdi gptgpqqi qgpqgsqgi q  
gatggtgaqppqgi qgpqgdvgptgpqgptgi qgi qgei gptgpegpegl qgpqqi qgvqgpvgtgpeg  
pqqi qgi qgvqgatgsqppqgi qgi qgvqgi tgatgaqatgi qgi qgei gatgpegpqqvqgvqgei gp  
tgpmpqgvqgvqgi qgatgaqgvqppqgi qgi qgptgatgetgatgatgeggtgptgvtgptgvtgpsg  
gpagptgptgpsgpagvtgpsggppgptgatgatgatgvtgdtgatgstgvtgatgetgatgvtgi qgpq  
gi qgvqgei gptgpqqi qgpqqi qgvtgatgaqppqgi qgpqgdi gptgpqqi qgpqppqgi qgatgatg  
aqppqgi qgpqgei gptgpqppqgi qgpqqi qgptgatgatgatgi qgi qgpqqi qgpqqi qgptgatga  
tgatgi qgi qgpqqi qgpqqi qgptgatgatgatgi qgi qgpqg-----

-----i qgpqqi qgptgatga  
tgatgsqgptgdtgptgagatgatgatgvsttatyafanntsgtai svl l ggtni pl pnnqni gpgi tvs  
ggntvftvasagnyyi ayti nl tagl l vssri tvngspl agti naptvatgsfsati i anl pagaai sl q  
l fgl vai atl stttpgatl ti i rl s

>' Dani o reri o (zebrafi sh)' type I alpha 1  
mfsfvdi rllal ll satvll argqgeddrtggsctl dgqvyndrdvkwpepcqi cvcdsgtvmcdevi ced  
tsdcpnvi phdeccpvcppdddfqepsvegprgsppgdkgergpagppgndgi pgqpgl ppppg-----

-----ppgppgl ggnfspqmsggfdeks-spmavppgmpgmpgprgagp  
ppgpsgpqgftgppgepgeagapgpmgprgaagppgkngedgsgkprpgergppgpqgar gfgtpgl  
pgi kghrgfsgl dgakgdagpagpkgepgapgen tpgamgprgl pgergragppgaagar gndgaagaa  
gppgptgpagppgfpggpgskgevpqgsrgaegpqqargeagnppagpagpagngadgapgakgapg  
apgi agapgfpprgppgaagaagapgpkgntgeagapgakgeagakgeagaqgvqppppgpegkrp  
rgepgaggar gptgergapgar gfpgadgaagprgaper gppgvvpgk gatgepgrngepmpgskgmt  
gspgspgdgktgl agapgdgrppppgvargqppvmgfpgpkgaaageagkpgergvmgai gatgapg  
kdgdvgapgapppagpagergeqgaagppgfqgl pppqgatgepgksgeqgapgeagapppsgsr gdrgf  
pgergapppagpvgar gspgsagndgakgesgaagappaqppgl qmpgergaagl pgl kgdrgdqgak  
gadgaagkdg i rgmtgpi gppgpagapgdkgesgaqgl vgptgarppgergetgapgpagfagppgadg  
l pgakgepgdngakgdagapppagatgappqppvgtgpkgar gaagppgatgfpgaagr vppgppsgn  
sgppppppagkegkgnrgetgpagrtgevgaaagppgapekgnppaegatgpagi pppqgi ggrgi v  
gl pqrgergfppl ppsgei gkqpsgspsergppppmppgl agppgepgergtgnegsagr dgaag  
pkdrgetgpsgtppagppgaagpi gpagktgdrgetgpagvppagpsgprgpsgpagargdkgetge  
agergmkg hrgftgmpgppppppsgesgpagasgpagprgpagsagsagkdgmsgl ppgi gppgprgrn  
gei gpagppppppppgagppsgggfdi gfi aqp-qekapdpfr-----

-----hfraddanvmrdrl  
evdttl ksl sqqi esi i spdgtkknpartcrdl kmchpdwksgeywi dpdqcnq dai kvycnmetgetc  
vnptesai pkknwytskni kek khwvfgeamtdgfqfeygsegskpedvni ql tfl rl msteasqni tyh  
cknsi aymdqasnl kkal ll qgsnei ei raegnsrftysvtedgctsthtgawgktvi dykttktsrl pi  
i di apmdvgapnqefgi evgpvcfl

>' Dani o reri o (zebrafi sh)' type I alpha 3  
mfsfvdi rllgl ll aavvl avrgqgeddi sfgsctl egqnyndkdvkwpepcqi cvcdsgtvmcdevi ced  
tsdcanpei pdgeccpi cpdeevtaapeppyvdtvgpagp-----rgdpgpvppgrdgtpgen-----

-----gl pppppppgtsgl gggsfl sqmaygsekssgppqppppgmpgprgl pg  
pagsppqgftgppgepgepagpmpsrppppgkngedgagkagrppgergaagppqgar gfgtpgl

gl\_y\_wei ghted\_fasta. fasta

pgi kghrgfpgl dgakgdagi agpkgeagspgeagtpgamargl pgergrpppppsgargndgntgaa  
gppgptgpagppgfpggagakgetgaaggrgseppqgprgepgnppagaagpaggppsdtppgkgsppg  
aagi agapgfpgargpppgapngagppkgnngdpgl qpkgdagpkgeppvppqgl agnageegkrga  
rgepgaagpvpppgargapnrgl pgsdgappl gapgergangpmaaggasgesgrppgepl pgskgmt  
gapgsppgdgkagpsgapqddgrpppppagsrgapgvmgfppkgt dgesgkppgergl agptgpl gapg  
kdgdi gspgapgpapagekgeqgsagpsgfqgl pgaagatgetgkppgeqgl pgeagpsgppgrgdrf  
pgergapppgptgprgapsppndgakgeppgaaganggvppagmqmpgergagmpgargdrdggpk  
gpdgapgkdgvrmtgpi gppgspgapgdkeppgavpppl tprggppgergevgappagfagppgng  
qqgakgetgdsapkdgagppagpvgasgppqpagatgpkgarggagppgatgfpgaagrvgppgpsga  
sgppgptgpagkeqrgargekgpaprpgeagaagpppsgergsppdpgl gl agapppgvi gsrgi v  
gl pqrgergfagl agpsgepgkqgppsvgerppppmpppl sgapgeagregnpghdgvsgdrdppg  
pkdrgesgnsppgagppagppi gpsgktdrgeagpagpspagargal gpagprgdrgeage  
agergmkghrgl sgmpgvppgptsggeqppagatgpagprgpagsngsppgkdgmnvgppvppppgrs  
gemgpagapgl pppppppgsagppgepl pmpqqekgpdpl rgg-----

-----yraddasvrdrds  
evdtsl ksl sqki eni rspegtqanparmcdrdl rmchpewksgsywvdpnqgspl dai kvfcnmetgetc  
vspyhdsi prknwytskni rekkhwfgesmpngfqqfygsdgsdpedvni ql tfmrl msnqgsqni tyh  
cknsi aymdetsgnl kkal l l qgsndi ei raegnsrftyrvsedgctshtgtwgtkvi dykttktsrl pi  
i di apmdi gapdqefgvevppvcfl

>'Drosophila melanogaster (fruit fly)' type IV alpha 1  
ml pfwkrl l yaavi agal vgadaqfwktagtagsi qdsvkhynrnepkfpi ddsydi vdsagvargdl pp  
knctagyagcvpkci aekgnrgl ppgl gptgl kgemgfpgmegpsgdkgqkdpypqrgdkgergspg  
l hgqagvppvqppagnppagpi ngkdgcddgdgi pgl egl sgmpgprgyagql gskgekgepakengdya  
kgekgeppwrgtagl agppgfpgkeggersdsgpygakpprgehgl kgekgascygpmkppagpi kgekge  
passfpvkpthtvmgprgdmqkgepgl vgrkgeppgedtgl dgqkgekgl pggpgdrgrqgnfppgs  
tqkkgdrgepgl ngl pgnppqkgeppragatgepgl l gppppppgggrtppppgkpprgyvgappqgl  
ngvdgl pppqyngqkdaggl pprpneppppgkgektagl ngpkgsi gpi ghpppppegqkdagl p  
gygi qgskgdagi pgypl kgskgergfkgnagapgdskl grpgtpgaagapqkdgdrpgtppqkdm  
gi kgdvggkcsscragpkgdktsgl pgi pgkdgarppppgergyppgerghdgi ngqtgppgekgedgrtg  
l ppatgeppkpal cdl sl i epl kgdkgypgagkqvqgfkaegl pgi pppkgefgekgl sgapgn  
dgtpragrddgypgi ppgsi kgeppfhrdgdakgdksfgrsgekgeppscal dei kmpakgnkeppgt  
gmpppgedgspgergytgi kgntgppppgvepprgl ngprgekgnqgavgvppgnpgkdgl rgi pgrng  
pppprgeppi srppmppppgl ngl qgekgrgptgpi gfpgadgsvgyppgdrdagl pgvsgppgi vgek  
gdvpi gpagvappppvpi dgvrgrdgakgeppsgl vmpgnkgdrgapndgpkfagvtgapgkrg  
papi pgvsgakgdkgasgl tndgppvgrppppagpi mgi kgdgl agapqaggl dmpgekgnqgfpgl  
dpppl pgdasekqkgepppsgl rdtgpagtppwpekggl pgl avhgragppgekdgqrsi dgrdg  
i ngekgeqgl qvvgppgeksgvppgi ppagmdgl pgaagapavgyppgdrgdkepgl sgl pgl kge  
tppvl qgftgapppkgergi rqppl patvpi rdkgsqgergytgekgeqgergl tppagvakgd  
rgl qpppgasgl ngi ppakgdi gprgei gypvgti kgekgl pprpgrnrgl i gapgl i gergl pgl pe  
srl vgl pgi gpagskgergl agspgppqdgfppagpi kgdtpqgfkgergl ngfegqkdkgdrgl q  
gpsgl pgl vqkgtgyppl ngndgppvppgergftgpkgrdgrdgtpl ppqkgeppml pppgkgepp  
ppgrnppkgepprgergl i gi qqel gekgergl i getgnvppgkdrgeppgergygai gl i gqkge  
ppagapal dyl tgl i trhsqetvpacsaghtel wtgysl l yvdgndyahnqdl gscvprfstl pvl s  
cgqnnvcnyasrndktfwl ttnaai pmpveni ei rqi srcvceapanvi avhsqti evpdcppngweg  
l wi gysfl mhtavnggggqal qspgsl edfratpfi ecngakgtchfyetmtsfwmyl essqperp  
qqqt i kagerqshvsrvcvcmkns

>'Gallus gallus (chicken)' type I alpha 2  
ml sfvdtri l l l l avtsyl atsqhvseasagrkgprgdgkqgergpppppprdgedgppppppppppp  
l ggnfaaqydpaskaadfgpppmgl mgprpppgasgppppppgfqgvppgeppggtgpppprppppppgka  
ge-----

-----dghpgkpprppergvaggargfpgtppg  
pgfkgi rghngl dgl tqppagptkgeppagpengtppqppargl pgergri gapgpagarsdgsagpt  
gpa-xxxxxxxxxxxxxxxxxgei gpagnegptgpapprgei gl pgsppvppppnppangl ppakgaag  
l pvvagapgl ppprgi ppppppagpsargl vgepppagakgesgnkgeppgaagpppppppsgeegkrsg  
ngeppagppppagl rpepprgl ppadragvmpagnrgasppvagakppngdagppgepl mpprxxx  
xxxxxxxxxxxxxxxxxgfpadgrvpi gpagnrgeppni gfpkgtgeppkpekgvnl agpprapp  
pegnnaqqppgvtgnqgakgetgpagppgfqgl ppspageagkppgergl hgefvpvppagppgergl  
ppesgavpagpi gsrpsppppdgnkgeppnvgpapppppgi pgergvagvppgkgekagpl r





gl y\_wei ghted\_fasta. fasta

-----i dasql vddgnadnymd  
yadgmeei fgsi nsl kl ei eqmkhpl gtqhnpartckdl ql chpdfpdgeyvwdpnqgcsrdsfkvycnf  
taggetci fpdkksegari tswpkenpgswfsefkrkgl l syvdsdgnpi gvvqmtfl r l l sasahqni t  
yncyqsvawhdattdsyd kai rfl gsndeemsydnpyi raafdgc aakkgyqktvl ei ntpkveqvpi v  
di mfndfgeasqkfgfevgpacfmg

>'Homo sapiens (human)' type I alpha 1  
mfsfvdl r l l l l aatal l thgqeegqveggdedi ppi tcvqngl ryhdrdvwkpepcr i cvcdngkvl c  
ddvi cdetkncpgaevpegeccpvcpdgsesptdqettgvegpkgdtgprgprgpapppgrdgi pggppl

-----pgpppppppppppgl ggnfapql sygydekstggi svpgpmgppsgprgl pg  
ppgappqqgfqpppgepgepgasgpmgprgppppgkngddgeagkpprpggergppppqgargl pgtagl  
pgmkghrgfsgl dgakdagpagpkgepgsgengapqmgprgl pgergrpgapgpagarndgatgaa  
gpppgtgpagppgfpgavgakgeagpqqprgseppqgvrgpgeppppagaagpagnpgadgppgakgang  
appi agapgfpgargpsgppqppppgpkngsgepgapgskgdtgakgeppvgvqpppppageegkr ga  
rgepgptgl ppppgerggpgrgfpgadgvagpkpgergsppgpagpkgspeagrpeagl pgakgl t  
gspsgppdgktgppppagqdrppppppgargqagvmgfpgpkaagepgkagergvppppgavgpag  
kdgeagaqqppppagpgergeqqpagspfgql pppppgeagkpeqqvpgdl gapgppsgargergf  
pgergvqpppppagprgangapngdgakgdagapagsqgagpl qgmpgergaagl pppkgrgdagpk  
gadgsppkdgvr gl t gpi gppppagapgdkgesgppagptgargapdrgepppppagfagppgadg  
ppgakgepgdagakgdagppppagpappgpi gnvgapgakgargsagppgatgfpgaagrvgpppsgn  
agpppppppagkeggkgrgetgpagrpevgpppppppagekgsppgadgpapagtpgpqgi agqrgvv  
gl ppprgergfpgl pppsgepgkqppsgasgerppppmpppgl agppgesregapgaegspgrdgspp  
akgdrgetgpagppgagpappgpvgpagksgrgetgpagpavgpvgargpappppgrgdgkgetge  
qgdr gi kghrgfsgl qppppppgspeqqpsgasppagprgppgsagapgdgl ngl p gpi gppppgrt  
gdagpvpppppppppppppsagfdfsfl ppppkekahdgr

-----yrraddanvvrdrdl  
evdttl ksl sqqi eni rspegrknpartcrdl kmchsdwksgeywi dppnqcnl dai kvfcmetgetc  
vyptqpsvaqknwyi sknpkdkrhvwfgesmtdgdfqfeyggqgsdpadvai ql tfl r l msteasqni tyh  
cknsvaymdqqtgnl kkal l l qgsnei ei raegnsrftysvtvdgctshgtawgkvti eykttktsr l pi  
i dvapl dvgapdqefgfdvvpvcfl

>'Homo sapiens (human)' type II alpha-1  
mi r l gapqsl vl l tl l vaavl rcqqqdvqeagscvqdqgryndkdvwkpepcr i cvcdtgvtl cddi i ce  
dvkdcl spei pfgeccpi cptdl atasgppgpkqkgepgdi kdi vgpkgppppqpppageqqprgdr gk  
gekagpprgrdgepgtpg

-----npppppppppppppgl ggnfaaqmaggfdekaggaql gvmqgppmmpmmpgppp  
pagappqqgfqgnpgepgepgvsgpmgprgppppgkpgddgeagkppkagergppppqgargfpgtpgl  
pgvkghrgypgl dgakgeagapgvkgesgspgengspgmpgprgl pgergrtpagaagargndgqppga  
gppppvppagppgfpgapgakgeagptgarpegaqpprgepgtpgsppagasnpgtdgi pgakgsag  
appi agapgfpprppppqgagtpgl gpkqgtgepgi agfkgeqqpkgeppagppqgappageegkr ga  
rgeppgvpi gppgergppnrgfpgqdg l agpkgapgergppgl agpkgangdpprpepgl pgargl t  
grpgdagppqkvpsgapgedgrppppppqargqppgvmgfpgpkgangeppkagekgl pgapgl rgl pg  
kdgetgaagppppagpgergeqqpagspfgql pppppppgeggkpgdqgvpeagapgl vpprgergf  
pgergsppaagl qppr gl pgtgtdgpkgasppppgaqpppgl qgmpgergaagi agpkgrgdvgek  
gpegappkdgg rgl t gpi gppppagangekgevgppppagsagargapgergetgppppagfagppgadg  
ppgakgeqgeagqkdagapppqpsgapppqgptgvtgpkgar gaqpppgatgfpgaagrvgpppsngn  
pppppppppsgkdgpkargdsgppgragepgl qppagppgekgepgddgppsgaegpppppgl agqrgi v  
gl ppprgergfpgl pppsgepgkqgappgasdrppppvpppgl tgpapeppregspgadpppprdgaag  
vkgdrgetgavgappppppsppagptgkqgdrgeagaqppmppsppagargi qppppgrgdgkgeage  
ppgerl kghrgftgl qgl pppppsgdqgasppagppppppppvpppsgkdgangi p gpi gppppgrs  
getgpagpppppppppppppppgi dmsafagl gprekpgdpl

-----qymradqaaggl r qhd  
aevdatl ksl nnqi esi rspegrknpartcrdl kl chpewksdywi dppnqct l damkvfcmetget  
cvypnpanvpkknwsskskekhi wfgeti nggfhfsgygdnl apntanvqmtfl r l l stegsqni tyh  
cknsi ayl deaagnl kkal l l qgsndvei raegnsrftytal kdgctkhtgkwgkvti eyrsqktsr l pi  
i di apmdi ggpqefgvdi gpvvcfl

gl y\_wei ghted\_fasta. fasta

>'Homo sapiens (human)' type III alpha 1  
mmsfvqkgswl l l al l hpti i l aqceaveggcshl gqsyadrdrvkwpepcqi cvcdsgsvl cddi i cddg  
el dcpnpei pfgeccavcpqptaptrppngqppqgpkgdppgppi pgrngdpgi pggpgspgspgppi  
ce-----

-----scptgppqnydqydsydvksgvavagl agypgpagpppppppgtsg  
hpgspgspgyqppgepgqagpsgppppgai gspgpagkdgesgrpgrpgergl pppgi kgpagi pgf  
pgmkghrgfdgrngekgetgagpl kgengl pgengapgmprgagpgerppl pgaagargndgargsd  
gpppppppgtagfpgspgakgevgpagspagsngapqrgpgeppqghagaqppppppi ngspgkgemg  
pagi pgapgl mgargpppagangapgl rggagepgkngakgepprgergeagi pgvpgakgedgkds  
pgepgangl pgaagergagpfrgpagpni pgekpgagergagpagprgaagepgrdgvppgmrgmp  
gspgpgsdgkpppgsqesgrppppgsprgppgvmgfpgpkgndgapgknger gppppppppppg  
kngtgpqpppgtgpaggkdgdtgppppqgl qgl pgtgpppgengkpgeppkgdagapppgkdaga  
pgerpppl agapgl rggagpppeggkgaagppppgaagtpl qmpgergl gspgkdkgeppg  
gadgvpkgdgrgptgpi gpppagppgdkgaggapgl pgi agrgspgergetgpppagfpgagqng  
epggkgergagpekgeggppgvagppgsgpagppppqgvkgergsppggaagfpgargl ppppsngn  
pppppsgspgkdgpppagntgapsgpvsppkdgagppgekgsppaagppgagpl gi agi tgargl a  
gppmpgprgspgppgkgesgkpgangl sgerppppqgl pgl agtagepgrdgnpgsdgl pgrdgspg  
gkdrngenspgagpghppppvpgpagksdrresgpagpagpagsrgappppprgdkgetge  
rgaagi kghrgfpgnpgapsppagqgai gspgpagprgvpgpsppgkdgtsghppgi gppprgpr  
gergsegspghppppppppgagpccggvgaai agi ggek-----

-----aggfapyygdepmdfki nt  
dei mtsl ksvngqi esl i spdgsrknparncrdl kfchpel ksgeywdpnqgckl dai kvfcmnetget  
ci sanpl nvprkhwwtdssaekkhvwfgesmdggfqsygnpel pedvl dvhl afl r l l ssrasqni tyh  
cknsi aymdqasgnvkkal kl mgsnegefkaegnskftytvl edgctkhtgewsktvfeyrtrkavr l pi  
vdi apydi gpdqefgvdvpgvcfl

>'Mus musculus (house mouse)' type I alpha 1  
mfsfvd l r l l l l gatal l thgqedi pevsci hngl rvpngetwkpevcl i ci chngtavcddvqcneel  
dcpnpqrregeccafcpceyvspnsedvgevgpkgdppgppgprgvpvppgrdgi pggpl pg-----

-----pppppppppppl ggnfasqmsygydeksagvsvpmpgmpgprgl pg  
ppgagppqgfqppgepgpessgpmprgppppgkngddgeagkprpgergppppqgargl pgtagl  
pgmkghrgfsgl dgakgdagpagpkgepgspgengapqmgprgl pgergrpppgtagargndgavgaa  
gpppgtptgppgfpagvagakgeagppgargseppqvrgepppppagaagpagnpgadgppgakgang  
aggi agapgfpgargpsppqpsppgkngsgeppagpnkgtgakgepgatgvqppppageegkrga  
rgeppsgl pppgergppgsrgfpgadgvagpkpsgergagppagpkgspeagrpeagl pgakgl t  
gspgspgdgktppppagqdrpppagppgargqagvmgfpgpkgtagepgkagergl pppgavgpag  
kdgeagaqgagppagpgergeqppagsppgfqgl pppagppgeagkpgeqgvpgdl gapgspgargergf  
pgergvqppppagprgngagpndgakgdtgapgapsqgagpl qmpgergaagl pppkdrgdagpk  
gadgspgkdgargl tpi gpppagapgdkeagpspppgtgargapdrgeagpppagfagppgadg  
qpgakgepgdtgvkdgadpppagppgpi gnvagppkprgaagppgatgfpgaagrvgpppsgn  
agppppppvgeggkprgetgpagrpgevgppppgpagekgsppgagpagspgtppqgi agqrgv  
gl pqrgergfppl ppsgepgkqpsgssgergppppmpppl agppgesgspgaegspgrdgag  
akdrgetgpagppgagpaggppvpgagkngdrgetgpagpagpi gpagargpaggpprgdkgetge  
qgdrgi kghrgfsgl qpppspspgeqpsgasppagprpppsagspgkdgl ngl pppi gppprgrt  
gdsgpagpppppppppppppsgydfsfl ppppeksqdggr-----

-----yyraddanvvrdrdl  
evdttl ksl sqqi eni rspegsrknpartcrdl kmchsdwksgeywi dnpqcnl dai kvycnmetgqtc  
vfptqpsvpqknwyi spnpkekhhvwfgesmtdgfpfeygsegspadvai ql tfl r l msteasqni tyh  
cknsaymdqqtgnl kkal l l qgsnei el rgegnsrftystl vdgctstgtwtgktvi eykttktsr l pi  
i dvapl di gapdfeqgl di gpacfv

>'Mus musculus (house mouse)' type II alpha 1  
mi r l gapqsl vl l tl l i aavl rcqqdaqeagscl qngqrykdkdvkpscri cvcdtgnvl cddi i ce  
dpdcl npei pfgeccpi cpadl atasgrkl gpkqkgepgdi rdgagprgrdgepgtgnppgagp---

-----pgpppppppl sagnfaaqmaggydekaggaqmgvmqgppmmpgprgppg  
pagagppqgfqgnpgepgpvsppmprgpppagkpgddgeagkpgksgergl pppmgarfgpgtpl

gl\_y\_weighted\_fasta.fasta

pgvkghrgypgl dgakgeagapgvkgesgspgengspgmpgrgl pgergrtgpaagaargndgqppga  
gppgpvpagppgfpagpagkgeagptgarpegaqgsrgepgnpgspgpagasgnpgtdgi pgakgsag  
aggi agapgfppgrppppqgattgl gpkqageggi agfkdgqpkgetgpapppagppageegkrge  
rgeppgagpi gppgergapgnrgfpgqdl agpkgapgergpsgl agpkgangdpgrpgepgl pgargl t  
grpgdagppgkvpsgapgedgrppppqgarqppgvmgfpgpkgangepgkagekgl agapgl rgl pg  
kdgetgaagpppspgergeqgagppsgfagl pppppppgeggkqgdqgi pgeagapgl vgrgergf  
pgergsppaagl qpprgl pgtptdgpkaagpdpaggppgl qmpgergaagi agpkdrgdvgek  
gpegapgdggrgl tpi gpppagangekgeagpppsgstgargapgepgetgppgpafagppgadg  
qpgakgdqgeagqkdagappppsgapppgtgtvtpkgargaqppgatgfpgaagrvgppgan  
ppagpppagkdgpkgvrgdsppgragdppl egpagapekgepgddgpsgl dgppppgl agrgi v  
gl pqrgergfpl ppsgepgkqgapgasgdrppppvppgl tgpapeggregspgadgppgrdgaag  
vkgdrgetgal gapgpppsppagptgkqgdrgeagaqgmpgspagargi agppgrgdkgesge  
qgergl kghrgftgl qgl ppppsgdqgasppagppgrppppvpsgkdgsgni pppi gppgrgrs  
getgpvpppsppppppppppi dmsafagl qprekdpdm-----

-----qymradeadstl rhd  
vevdatl ksl nnqi esi rspdgsrknpartcqd kl chpewksdywi dnpqgctl damkvfcmetget  
cvypnpatvprknwsskskekhi wfgetmnggfhsygdgnl apntanvqmtfl rll stegsqni tyh  
cknsi ayl deaagnl kkal l l qgsndvemraegnsrftytal kdgctkhtgkwgktvi eyrsqktsrl pi  
i di apmdi ggaeqefgvdi gpvcfl

>'Oncorhynchus myki ss (rainbow trout)' type I alpha 1  
mfsfvdi rll al l satvl l argqgeddrtagstcl dgqfyndrdvwkpepcqi cvcdsgtvmcdevi ced  
tsdcpnvi phdecpci cpddgfqepkvegpqgdrgakgeppagfpgndgi pppgl pppp-----

-----ppppgl ggnfspqmsggfdeksggmsmpgmpgmpgrppp  
ppgssgppqftgppgepgeagssgmpgrpagppgkngddgesgkpprgergasgppgargfpgtppgl  
pgi kghrgfsgl dgakgesppagpkgeggasgengaagamgrgl pgergragpngaagargndgaagaa  
gppgptgpagapgfppppgkgevgaaqgargggeppqsrgeagnppagaagpagngadgnpgtkgapg  
ssgi agapgfppgrppppqgaggapppkngtgevngakgeagakgesppagvqppagpageegkrge  
rgeppgagargapgergapsrgfpgsdgasgpkggppgerggagvagakngtgepprgeppgmpgskgmt  
gspgspgdgktpgsagggdgrppppvgarqppgvmgfpgpkgaageggkpergvmgpsgavgapg  
kdgdvgapgavagpsgergeqgagppgfagl sgpqgai getgkpeqgl pgeggapgsagsrgdrf  
pgergappsgpagargspgsagndggkgeagaagapggqppgl qmpgergaggl pgl kgdrgdqgvk  
gadgaggkdvrgmtgpi gpngpagspgdgetgapgavgpsgargapgergesgapgafagppggdg  
qpgakgeagdnakgdggaqppagptgapppqpagntgakgargaagppgatgfpgaagrfgpppsgn  
ngppgtppgggkqgnrgetgpagrpgel gaagppgpkgekqppgdgngpsgtppqgi gqrgi v  
gl pqrgergfpl aggl gepkqppppfgerppppmppgl agapgepgegtppnegssgrdgaag  
pkgergesvagasgppppgavpagksgdrgesppagpagi agpagppgspagargdkgesge  
agergmkgghrgftgmqpppsgqsgesppagasppagppgsagsagaagkdgmgl pppi gppgrgrs  
gemgsgtppppppppppppppgfdmgfi aqpaqekapdfr-----

-----hfraddanvmrdrl  
evdttl ksl sqqi eni rspegtkknpartcrl kmchpdwksgeywi dpdqgctq dai kvycnmetgetc  
vypteadi pkkswytskni kekhhvwfgeamtdgfqfeygsegsnakdvni ql tfl rll mateasqni tyh  
cknsi ayndqqsgnl kksl l l qgsnei ei raegnsrftysvtedgctsthtgawgktvi dykttktsrl pi  
i di apmdvgapnqefgi evgpvcfl

>'Oncorhynchus myki ss (rainbow trout)' type I alpha 2  
ml sfdnrll lll avtsl l ascqs-----ggl kgprgakpgrgdrppqppngrdgkagl pgi agppppp  
l ggnfaaqfdggkgsdppppmgl mgsrgppppgppgqftghageppgeppqtsi gargptgsagkp  
ge-----

-----dgngprgkpgdrppgtqgargfpgtppgl  
pgmkghrgynl dgrkgesgtagakgetgahgangsppagsrgl ngergragpagpagargadgstgpa  
gpapgl gaagppgfppagppkgei ggagsngpsppqpprgeppi ngavgpvppvgnppngi ngakgaag  
l pgvagapgfppgrppppqppqgstgargl gdpgpsgqkdgsgakgepphsgvqgaagpageegkrge  
tgevgtgpagl rgarggagtrgl pgl egrgppi gmpgargatppgi rgapgdagragesgl tgargl p  
gnsgqppppgkeppgaagl dgrtppppgtpprgppni gfpgpkgppgeagkggdkgptgatgl rggp  
adgnngapppagvvgntgekgeqppagppgfagl pppagpageagkagnqmpgdqgl pppagvkgern  
sgpagsagsqgai gargpagtppdggkgeppsvgi vgaaghqppgmpgergaggtppkgekgegggr

gl y\_wei ghted\_fasta. fasta

gl egnmrgdgarggppgsgppgsgangekgesgsfgpagpagl rgpsgergeggpagl pgfagppgsdg  
qsgprgekgpaggkdvvpagpagpssgqsgpsgasgpagppggrgdagpsgl tgfpgaagrvggppgpagi  
agppgsagpagkdgprgl rgdppgppqgeqqvvgpagi sgdkgpsgesgpppagpagttagppgvl gpsgfv  
gl pgsrgdkgl pggpgavgeprgl gpagasprgpagni gmpgmtgtqgeagregnsngndgppgrpgaag  
fkgrgepgspgal gssgqppngpagsagrppnr gesgptngggpvavgar gappagprgekggage  
kgdrgmkg l rghggl qgmpgpnpsgetgsagi tgpagprgpagphgppgkdgragghgai gpvghrgsp  
ghl gpagpppsgl ppgpaggggydqsggydeyradqpsfra-----

-----kdy  
evdati ksl nsqi enl l tpegscknpartcrdi rl shpdwssgyfiw dnpqgci adai kaycdfstghtc  
i hphpesi arknwy--rssenkkhwfgeti nggtefayndetl spqsmatql afmrl l anqatqni tyh  
ckns vaymdgengl kkal l qgsndvel raegnsrftfnvl edgctrhtgqwsktvi eyrtnkpsrl pi  
l di apl di geadqefgl di gpvcfk

>' Oncorhynchus myki ss (rainbow trout)' type I alpha 3  
mfsfvdi rl al l l saavl l argqgeddsgfgscsl dgqyndkdvwkpepcqi cvcdsgtvmcdevi ced  
ttdcadpi i pdgeccpi cpddsesedpql pegpqqpqqgdgpkddgpegvpgndgvdgqpgl -----

-----pgppppppppgl gggv fspqmhhgydqkssggqaqmqgmppmprgl ag  
ppgntgppghhgppgepgepggsgpmger gamgphgkngdngepgrsgrpgergsagpqqgrgtptgpl  
pgi kghrgfngmdgakgdgppagpkgeggspgssngsgamgargl pgergrppagssgargndgngspa  
gsngptgpsgagpfpaggagakgetgpqqgrgsdgpqgsrgepgnppagaagpsgapggdggaggkgs tg  
aagi sgapgfpgtrgpagppsgggngpkgnhgehgaqqpkgepgvkgepgsagppgppgsggeegkr ga  
rgepggaggvppgergmpgmrgfpgsdgaaggkggppgergangpmaagga teagr pgepgmpgskgmt  
gspgspgpdgkvgpagvtgndgrsppgssgargqppgvmgfpgpkgppgdngkppergeagavvg l gapg  
kdgdsgapppqgpagsgqekgeggpagpngfql pgtqgatgepgkageqqgpggevvgppgsgsr gdrgf  
pgerggi gsagpagprgangspgndgargesgaagapggmgapgl qgmpgergsngngsakgergdggpk  
gadggpgkdgmrgmtgpi gppgptgahgekggg l gppgptggrgspgergehgapppagfagppgadg  
qpknkgetgnngpkgeagapppgppvgapppagpagnsgtkgtrgapppgasgmpgppgvrppgsga  
pgsagpppagkegqkgrgetgi agrpgeagaagppgsgasgakgndgmpagp gtpgggi agqrgi v  
ggppgrgpgstagi pgtagepgkqppgppvgergsppmppgl sgapgeagregstghdgvsgrdgppg  
pkdrgengnagspgapppgagppsgasgktsr gesgpagpagnppagrggl gpagargdkgeage  
ggerghkghrgl ngmpgl ppgpsgspgespagl ngpsgrgphgssgstgkdgmngl pgpi gppgprgrn  
gkmaagapgspl pppppagggfhvapi ynqekgpdpmrgg-----

-----ggyhyradepdmmngrdm  
dvdttl ksl sqkveni rspegsqknparmcrdi rmchpewksqywwdnpqgspl davqvynmetgetc  
vyqsqdtvpmknwytskni rekkhwfsesmdngfqqfygsegsnpedvni ql tfmrl msneasqnvtyh  
cknsi ayndeatgnl kkal l l qganei ei raegnsrftysvsedgctsthtgtwgktvi dyktsktsrl pi  
i di apmdvgapdqefgvevgpvcfv

>' Paralichthys olivaceus (bastard halibut)' type I alpha 1  
mfsfvdl rl al l l saavl l vraqgeddraggsct l dgqvfadr dvwkpepcqi cvcdsgtvmcdevi ced  
ttdcpnvi phdecipi cpddgfqdsqvegpkgergpkdrgl pppgndgi pqqngl ppppg-----

-----pppppgl ggnf spqmsggyddks-pgmsvppgmpmmpgppg  
pagssgppqgftgppgepgeagasgpmprgaagppgkngedgesgkpprggergpgspqgargfpgtgpl  
pgi kghrgfsgl dgakgdsgpagpkgeagtpgengtpgamgprgl pgergrtgatgsagargndgaagaa  
gppgptgpagppgfpggpgakgeggpqsrgpegpagar gepgsagpagaagpagnpgtdgapgakgl pg  
sagvagapgfppgrppgaggaagatgpkngtgeagapgakgesgakgesgvagvqppgpgsgeegkr ga  
rgepgaagvrppgerggppgrgfpgsdgsagakgapgergapgl l gpkgstgepgrtgeagl pgakgmt  
gspgspgpdgkmaagapqdgprppgsvgarqppgvmgfpgpkgaaageggkppgergvmgptgpvgapg  
kdgdvgaqqpsgspgagergeqgaagppgfql pppqgavgetgkppgeql pgeagatgpagargdrf  
pgergapi ngpagar gspgsgndgakgdagapagaagppgl qgmpgergsagl pgl rgdrgdqak  
gadgagpkdgrgmtgai gl pgaagatgdkgeppaggi vmpagargppgergesgppgpagfagppgadg  
ppgakgeagdngakgdagppgsgptgaagppgpgvntgpkgar gpagppgatgfpgsagrvgppgsgn  
agpagppgatgkegqkgrgetgpagrpgemgaagl ppgsgekgnpgeagapgsagi pppqi nggrgi v  
gl pqrgergfpl ppgsgevghkpgspnngergppgmpgppgl agapgeagregapgnegsagr dgaag  
pkdrgesgpagasgppgagppvpgagksdrgesgpagpagsagpagprgpagapgl rgdkgesge  
agergmkgghrgftgmqqpppagasgdqppagaagpagprgpsgsagsagkdgmsgl ppgtgpppgrgrs  
gemgpagppppgpagapagppgfdl gfi aqp-qekapdpyr-----

gl y\_wei ghted\_fasta. fasta

-----mfraddanvl rdrdl  
evdstl ksl sqqi eqi rspdgtrknpartcrdl kmchpdwksgeywi dpdqgctqdai kvycnmetgetc  
vpsqrevakknwyvskni kekhhvwfgeamndgfqfeygsegsapedvni qmtfl rl msteasqnvtyh  
cknsvaymdasvgnl kkal l l qgsnei ei raegnsrftysvl edgctshgtwtgkvti dyktsktsrl pi  
i di apmdvgapdqefgl evgpcvfl

>'Paralichthys olivaceus (bastard halibut)' type I alpha 2  
ml sfvdtri l l l l avtsyl ascqs-----mgprgdkgprgdrpkpdpdndgkpgl ppppppppppp  
l ggnfaaqydgskgpdagppgmimgargppppppppppqgghtghagepgepgqtgal gprgppppgka  
ge-----

-----dgnngrpgkpgdrgapgvqgargfpgtpgl  
pgmkghrgygtl dgrkgepgsagakgesgahgaagspgl agsrgmagergragpagaagaradgnvga  
gpsgpl gaagppgfppgppkgei gpagatgpsgaqgsrgepgangavpvgpagnppangl ngakgaag  
tpgvagapgfppgrgppppppqgaagprgl agdpgaqqvkgdggpkgepgnsppqgspgphgeegkrpp  
tgepgatgpagsrgargaagsrgmpgaegrtgpvmppgargstgsggprgppgdagragepgsagl rgl p  
gspgssppgkegpapagqdgrtgpmpgtgprgppgni gfpgpkgasgeagkpkgekgatgptgl rgtpp  
pdgnngatgamgpaggpgekeqgppsgapgfqgl pppagaageggkppgdrgi pddqgl apagakgergi  
ngvagasvqgavgarppagapgdgskgeppi tgaaggpghgppgmpgergaagapggkgekeggghr  
gpegnagrdgarmppagppgtgangdkgesgsfppagpagprgasgergevgpagapgfagppgadg  
qpgargergpapi kgevpspsgpagqsgppagppagppgargdngpsgl tgfppagrvtpppapi  
vgppgptgaagkdgprgprgdvppggsgeqgmvgppgvgekppsgesppgagpaggtpgl gl qgfv  
gl pgaragdrgspggaggl gepgrvppppsgargppgni gl pgmtgpqgeagregnpndgppprppagp  
fkgrgepppagamgl agapppagpsgaagrppnrgepsppgaagsvppagargaagpagsrgekvggd  
kgergmkl rghpgl qgmpgspgsgdtgaagpagssgprgpagphgpagkdgragghgti gspgarpp  
gyvgpaggppppgl pppagpsgggydvsg-ydeyradqpal ra-----

-----kdy  
evdati ksl ntqi dnl l spegsrknpartcrdi kl shpewssgyfiwi dppqgsndai kvfcdfttrec  
i yahpesi arknwf--rsteskkhvwfgeti nggtefayndetl spqsmatql afmrl l snqasqi tyh  
cknsi aymdgergnmkkavvl qgsndvel raegnsrftfsvl edgctthtgewskvti eyrtnkpsrl pi  
l di apl di ggadqefgl di gpcvfk

>'Rana catesbeiana (bullfrog)' type I alpha 1  
mfsfvdtri l l l vi aati l vakcqeddl gysgcvvdgrtyndkdvwkpeacqi cvcdegiti l cdevi ced  
i gdcnppei pmgeccpvcgeggyqtgsvvegpkggetgprgergppgagprdgi pppppi ppp-----

-----ppppppagl ggnfapqmsygydeksagi smpgpmgmpgprgppp  
psgspgppqgfqpppgepgepgaagamgprgppppgkngedgeagkpprgergppppqgargl pgtagl  
pgmkghrgfngl dgakgdtgpagpkgepgnpgengappqvprgl pgergppgspgpagargndgtppaa  
gppgptgptgppgfppgvppkgdaggppgsrppdppqgargeppagqagpagsagnpgtdgppgakgatg  
apgi agapgfpgargapppppgppgkgnngpeggaqgnkgepgakgesgpagsqppppppgeegkrps  
rgeppspgpppgergapsrgfpgadgaggpkpppgergppvgsagpkgspsgesrppgepl pgakgl t  
gspgspgpdgktpagapggdgrppppppgargqsgvmgfpgpkgaaagepgkppgergvagppgavgapg  
kdgeagaqpppppagpgergeqppagppgfqgl pgsppaggesgkpeqgagpddvpsgpagsrgergf  
ppergai gpppppprgangapngdgaageagppagppgppsgl qgmpgergaggl pgakgdrgdqgpk  
gadgapgkdgvrgl tppi gppppgagpdkgeagpagpagptgsrgapgergepppsgpagfagppgadg  
ppgakgeqgdagpkgdagppgaagptgapppagavgatgpkgarppagppgstgfppaagrvgppgppsgn  
agppppspgpagkegkqprgetgpagrppgeppgaagppgspgkgspsgdgpagapgi pppppi agtrgtv  
gl ppprgergfpl ppptgepgkqgssgppgergppppgpppl agppgeppregspgsegspprdgsag  
pkgdrgesppagppgagpaggpagpagkngdrgetgpagpagpagpagargpsppagargdkgeage  
qgergmkgghrgfndl pppppagphageqppsgasppagppppgssgspgkdgsgnl pppi gppppgrt  
gdvvpagppppagppppppppgggfdfsfmpqppqeksh-----

-----hyraddanamrdrdm  
evdttl ksl skqi eni rspegtrknpartcrdl kmchsdwksgeywi dppqgcti dai kvfcnmetgetc  
vyptqsti dqknwyi snprekhhvwfgetmsdgfqqfdygsegsdpadvni ql tfl rl mateasqi tyh  
cknsvaymdqetgnl kkal l l qgsnei ei raegnsrftysvi edgctqhtgqwgkvti eyktpktsrl pi  
tdvapmdi gapdqefgvei gpcvfv

gl y\_wei ghted\_fasta. fasta

>' Rana catesbeiana (bullfrog)' type I alpha 2  
ml sfvdl rsvl l l avtl yl vtcqevrrgprgdkgppgeqqppgi pgrdgedgl pgl ppppgvpgl gg---  
-----nfaaqydpksaepgqqgi mgprgppgppgspsqgfqgl pgengepgqtgpvgsrgpsgapgka  
ge-----

-----dghpgksgrpgergpvpgqgargfpgtpgl  
pgfkgi rghtgsdqkqgapgaagvkgengangdnsgppqagargl pgergri gpagsagsrgsdgssgpv  
gpapgi gsagapgl pgapgakgel gpagnngptgaaggrgepppgsl gpagppgnpgtngvngakgtag  
l pvggagpl pggri pppagpagpsgargl agdpgi agkgdtgskgepgsvqqppagpsgeegkrpp  
ngeagssgpsnagi rgvpgtrgl pppdgraggi gpagsrgssgppgargpndagrppgepl l gargl p  
gfsngppqgkegpapqgi egrsgaagpagargepgai gfpgpkgpngepgkngdkngqgsgnrgap  
pdgnngaqqpagl ggatgekgeqqpsgapgfqgl ppppppgevgkppgergapgdfgppgsagtrgerga  
pgeggagphgpsgrpsgapppdgqkgeppaagl nggl gpsgpagi pgergtagtpgtkgekdgagns  
gdygnpgrdgargpagaagapppagppgdr gesgpagpsgvagprgapgergeagpagptgfapppgaag  
htgakgdrgakgpkgeagsppgl gahgsagpagnpagstgargdagpsgatgfpagpagragapppgn  
vpgspgtghpgkdgsrgprgdsppvgrpgeqqqhgpvpl agdkgpsgeagpagppgaagpsgl gargl l  
gl pgrtrgergl pppgnggeppsgl agssgprgppsvgsppvghsgeagr dghpndgppgrdgl pg  
akgergypntgpsgl agapgpagsagpagksnrgeggpsgpagi tgpsgprgpagppgvr gdkgeage  
rgargl dgrkghngl sgl pppsgtpgetgpsgsvgppgprgspgspgppgkegrsghpgamgpvgrgpa  
gftgpagppppppghagpsgggydggdgyeyradqperkp-----

-----kdy  
evdatl ksl nqqi evi l tpegrknpartcrdl rl shpewtsgfywi dnpqgctsdai rvfcdffssetc  
i hanpdei tqknwyi ntsnkdkkhl wfgei l nggtqfeyhdegl takdmatql afmrl l anqasqni tyh  
cknsi aymdeetgnl kkavi l qgsndvel raegntrftysvl edgctkhtgewgktvi eyrtnkpsrl pi  
l di apl di gghdqe i gfei gpvcfk

>' Shrimp white spot syndrome virus' collagen  
mayi dqgafgaksvmqqqyl l ppsnr l skqqpl asssl qpssnkprstsrvt di fvvi tcvvl i aafi  
snsfsvtknvkl skeqteki l ekdl pdkvykl fenl kdgtf gi gedeeereergegeeel etkni rl k  
rkwkemteqqdqi kvrl hgrprgergetgpagavgpapppgergai gpagkdgavgpapppgergai gp  
agkdgavgpqppgergengrp-----

-----grdgavgpqgergai gpagkdgavgpqgergai gpagkdgavgpapppg  
ergengrpgrdgavgpapppgergai gpagr dgavgpapppgergatgi pgrdgvdgsvgpqgergei gr  
pgrdgavgpappprrgatgragkdgavgpapppgekgeagkdgsi gpqgi qpprgetgppgrdgtaer  
gergfppppgetgppgkdgdvdgsegppqkrgetgpvgrgepgl agl pgrdgai gpagppgergatgl pg  
rngvdgsi ppprrgatgragkdgavgpapppgergatgi pgrdgvdgsvgpqgergetgpagr dgsvgr  
agppqgergengrpgrdgatgpi gpagppgekengrpgrdgatgpi gprgetgamgkngvdgsmppqrr  
gatgragkdgavgpapppgergetgpagr dgsvgpapppgetgl tgspprdgatgpi gpagppgekeng  
rpgrdgatgpi gpagppgekengrpgrdgatgpi gpagppgetgl tgrpgrdgatgpi gprgetgamgk  
ngvdgstgpprrgatgragkdgavgpapppgergengrpgrdgatgpi gpagppgetgl agl pgrdgai  
gpqgekengrpdkdgatgpmppgergetgpi gpagppgatgl pgrdgvdgsvgpqgkrgl i grtgrdg  
ai gpvvpagpkgetgl agl pgi dgkdgsvppqai gpi gprgergetgrpgrdgedgstgpmppqgl rga  
tgappqgergl kprgkdgetgppgrqrdgi mgprgl rgekagpndgl egpegrdgapppagpi gpq  
gi rgl kgi qgrpgrdgemgpagkdgi egprgdgttgakgprgl rfgqgrtgetgaqgsrgekgrgl tg  
ppgrdgppgeegppgl rgergpprgprgi rrgspqgsngvqpprgprgtrkgrtgi qgl tgi egprgp  
rgi qgkegrmgki ghrgekgdkgdrgeqgi agadgekprgl rgi rgpi gapgkpgtegrgprgvr gvp  
gypgaqgel gpqptgpqppagppgmrtgdtgpmppgavgp-----rgek  
ggrgrkngkngpkgadgdavni i qkysi tharaei mwegnei geayi grsygt di pvmi enri gmtnd  
kkneyci qvmtmhsi ttrgrtsgvfvsnktdyi l l vt l l mpesvscrt dvstnarservnavreresks  
yrfi rpsdqi gthsrski avmypoasmsysvdtl dadvarrettsvl l l aeti hgekdrgyadrgrtv  
grl mvppteel l vl qadpdi tpti adpi tvaevgnpvvri ktpscdel nkfmf stnfsfl kyvkrfma  
qassnsrndmsaf l l dl i fekl i efl l stgwnreal ggttgai l mi rtatcr l aqsyyp l petvgmdfl  
qtpgf dynksl pnneryi yefqatm

>' Streptococcus equi ' collagen  
mi nkrkkkl i yrygvcsaavi l aal asl gtckeakal sgppgypl trdfsrnfl eentakyl dql rehl q  
hrf sel esl trkl ekeggtrgpappppagpkgergeppvpmgprgeqqpkl dgargpegqqgkppg  
vg-----







gl\_y\_wei\_ghted\_fasta.fasta

-----rpkgpdpI ygddpnagkts  
krytkedI kkdetafeal vei geai eafknptgtraapartckdl al ahpemedgvywvdpnqgspi dai  
evychi kthqtcvfakpsqvfkgsywsgpqkyvwfgedmdngfqfkykadrvqmtfl qI I steayqni ty  
hcqnsapfynmqtqstdnaakfmtsndl el qanhkkftysvkl decqyki kkwasttfefttktrrl pi  
I di apydi ggpdaqafgl ei gpvcs

>'Ri fti a pachypti I a' collagen alpha chain  
yra-----

-----gpriy qaavgpi gprgppppgsppqqyyqgl rgepgdsgpmgpi gkrppppagi a  
gksdgdgrdgepprggi gpmgprgaggmpgmpgxhrgfrgl sgxgeqgksnqgpdggppagpsg  
pi gprgqtgergrdgksl pgl rgvdgl agppppppgi gstgspgfpgtpgskdrgqsgl xgaqgl qgp  
vgl sgqpgvagenghpmpgndgangepgasgesl ppgspgfpgrgmpgtagspgqagaxgdggptgeq  
grpgagpvxgssgppgdvgapghageagkrsgpspgpagspgqgdrgl pgsrgl pgmtgasgamgi pg  
ekgspgepgakgptgdtgrqgnqgtpgi agl pgnpsdgrppgkdgrppi rgkdgkqgeqppqppgl agl  
qragppgargepgkngapgepgahgeqgdagkdgetgaagppgaagptgarpppprgqqfql agaq  
gtpgeagktgergavgatgpsgpagppgergagpdrngvprgmpgergatgpagptgspgvagakggg  
ppppagl vgl pgergpkvggsxgsrgdi gprgkagergkdgergergengl ppgsl aasxgergdmgs  
pgergspgagergpagsqi qqqppppgdagpagtxgdi gfpgergtrgatgkqgarpprgl agkrgl r  
gaggsrgetgaqgei gl pgsppqgl ppgspqppsgpagtagkqgvxgargspgl vgkqgdrgsdgepg  
rdgtxgergedgppgvsgptgappqqgergmpgmvgI rgetgpmggqgmxdggpppsgdrgergnagp  
qqptgspgqagapqegapgkdgl pgl agrpgergepgvagragsqgl agl mgqrgl pgaagppgdrger  
geaggqvvgpvgapgsqppagi mgmxgeaggkxagdkgwgt-----

-----I pgl qgl qgtpghsesgppgagprgar geaggrgsqppgkdqppgsgrvgrgps  
gddgrsgppppppppppnsdyga

>'Ephydati a muelleri' fibrillar collagen  
mgp-----

-----ppngenganpvppppppgagdpgfsgl dgkngkpgnqgprgdtgppgsvgnagl  
pgapai mppgffdpkgpapel sgvkgarpsgl sgpsgpagprgdhgdgqpgi pghpgnqgaggi I gqp  
gvpgvpgdtgpmgl pgvpgpdgmpgqsgsgqsfkgl gpkgtvgdqgsqgdagppgaqgdqrrgagp  
akggvgal grpsagai gl pppageagpagqtgpagpkgakggkgl vgpqgl pgl agpqqdqqdagstgl  
tgappagl ngrdgapgkdgl ngasgsi gi tgdI gl tgdagsqgi ppgvppqppgpgdtgal qppgat  
gapgkegkqvgfpgapgdrgl qgdmgmkgvkgesgdmgpagpagvi gapgmkgppgkpgi pgl dgrI g  
akgtpgsnprgpi gl pgvpgvdgkagaagapgvtagpkegrpgstgl sgaageppgdgvqgsi gdtgs  
agpvgapgl tgptgskgpagaegtppmpgaagpagvtdghngvqqqpegprgpagptgppgi vgvpgdq  
gdvgvpgqagaqpsgpagdvdrgl qgeagdgl pggsgqgl pgepgkegvpvgnqgeagdngppqaag  
epgl pgpvpl gapprgadgi agdagvpi agl kppppppnrgal gpqgyqppppqppmpgi gnrgp  
i gpsgptgpagpvndgnqqppvpl pgdagmagl sgpmgedgdagapgyppgegl pgtgl pspfaI q  
gdagaqgdqghppgi gapgatgpvl pgi qvppngdvpgagptgpagl dgapgaqppdgepgl pgl pg  
qsgksgasgqppvppvgaagkpgsi rgqppppppgdI grpgergakgvrtpgagpvdgvagi agai g  
fppmpgdgaagpsgyppfdgvagkppqgamgpkqagerppqgtpgtqgskgvvpgkvvppqgdsgd  
tdagqkgargtagsvgakgtvl pgnqppqppagl kvvkgk-----

-----gevgdkgi I gpdgdkgptgmsgdagpagpi gdagi qppppqdgptgaqpprggqppkpg  
agavgdvdrgstgpagppppgpt

# weighted tree

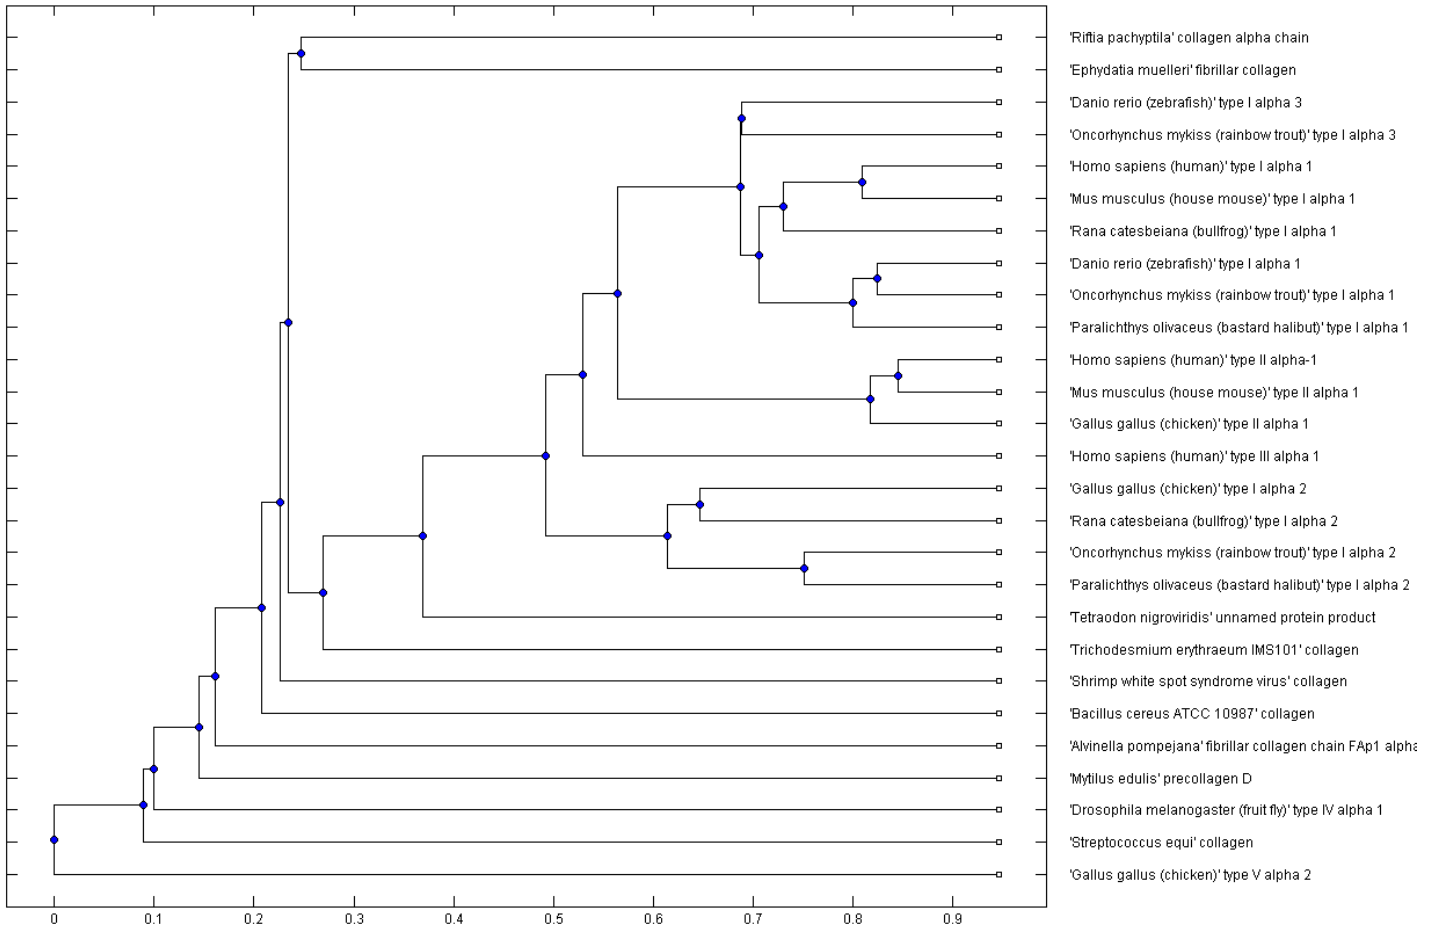

| GenPeptID | Species                                    | Type                                | Chain   | Sequence                           | Length       |
|-----------|--------------------------------------------|-------------------------------------|---------|------------------------------------|--------------|
| NP_981161 | 'Bacillus cereus ATCC 10987'               | collagen                            |         | 'mkerdkqnslnsnfrispnligptfppvpt    | 1321         |
| AAH63249  | 'Danio rerio (zebrafish)'                  | type I                              | alpha 1 | 'mfsfvdirllllsatvllargqgeddrtggs   | 1447         |
| AAH58045  | 'Danio rerio (zebrafish)'                  | type I                              | alpha 3 | 'mfsfvdirlllgaavvlavrgqgeddisfgs   | 1449         |
| AAA28404  | 'Drosophila melanogaster (fruit fly)'      | type IV                             | alpha 1 | 'mlpfwkrllyaaviagalvgadaqfwkta     | 1775         |
| AAB64082  | 'Drosophila melanogaster (fruit fly)'      | type IV                             | alpha 2 | 'mlprdrhlsglpggvvylglsvsvtladgki   | 1761 DELETED |
| P02467    | 'Gallus gallus (chicken)'                  | type I                              | alpha 2 | 'mfsfvdrlllllavtsylatsqhvseasagr   | 1362         |
| AAK98621  | 'Gallus gallus (chicken)'                  | type II                             | alpha 1 | 'mhgrpprsaallllllltaaaaaqdrdrqr    | 1420         |
| Q90689    | 'Gallus gallus (chicken)'                  | type V                              | alpha 2 | 'alpgspgpdgppgplgppgplgkgsdsc      | 390          |
| P02452    | 'Homo sapiens (human)'                     | type I                              | alpha 1 | 'mfsfvdrlllllaatallthgqeegqvegqd   | 1464         |
| AAC41772  | 'Homo sapiens (human)'                     | type II                             | alpha-1 | 'mirlgapqslvlltllvaavlrccgqdvqea   | 1487         |
| P02461    | 'Homo sapiens (human)'                     | type III                            | alpha 1 | 'mmsfvqkgsdlllallhptiilaqqeaveg    | 1466         |
| P11087    | 'Mus musculus (house mouse)'               | type I                              | alpha 1 | 'mfsfvdrlllllgatallthgqedipevscihr | 1453         |
| AAA68100  | 'Mus musculus (house mouse)'               | type II                             | alpha 1 | 'mirlgapqslvlltlliaavlrccgqdaqea   | 1459         |
| BAB55661  | 'Oncorhynchus mykiss (rainbow trout)'      | type I                              | alpha 1 | 'mfsfvdirllllsatvllargqgeddrtags   | 1449         |
| BAB55663  | 'Oncorhynchus mykiss (rainbow trout)'      | type I                              | alpha 2 | 'mfsfvdrlllllavtsllascqsgglkpgrg   | 1356         |
| BAB55662  | 'Oncorhynchus mykiss (rainbow trout)'      | type I                              | alpha 3 | 'mfsfvdirllllsaavllargqgeddsfgs    | 1458         |
| BAB03287  | 'Pagrus major (red seabream)'              | type V                              | alpha 1 | 'memqrwttrwtkrwlwdssltaavtlivi     | 1820 DELETED |
| CAE53096  | 'Paracentrotus lividus (common urchin)'    | type                                | alpha 5 | 'mysfvdqslqhrklllilvalatsavicqgq   | 2795 DELETED |
| BAD77968  | 'Paralichthys olivaceus (bastard halibut)' | type I                              | alpha 1 | 'mfsfvdrllllsaavllvraqgeddragg     | 1447         |
| BAD77969  | 'Paralichthys olivaceus (bastard halibut)' | type I                              | alpha 2 | 'mfsfvdrlllllavtsylascqsmgprgdk    | 1352         |
| O93251    | 'Rana catesbeiana (bullfrog)'              | type I                              | alpha 1 | 'mfsfvdrlllviaatilvakcqeddlgysg    | 1445         |
| O42350    | 'Rana catesbeiana (bullfrog)'              | type I                              | alpha 2 | 'mfsfvdrsvllavtlylvtcqevrrgprgdk   | 1355         |
| AAK77699  | 'Shrimp white spot syndrome virus'         | collagen                            |         | 'mayidqgafgaksvmqqqyllppsnrls      | 1684         |
| AAQ91575  | 'Streptococcus equi'                       | collagen                            |         | 'minkrkkkliyrygvcsaavilaalasgtc    | 491          |
| CP000393  | 'Trichodesmium erythraeum IMS101'          | collagen                            |         | 'medfldqivfptdssfqstpintlvpgesitv  | 1340         |
| CAG02093  | 'Tetraodon nigroviridis'                   | unnamed protein product             |         | 'MFSFVDLRLALLLSAQGLLVRL            | 1399         |
| AAB96638  | 'Mytilus edulis'                           | precollagen D                       |         | 'MVYKLLTVCLVASLLEICLADY            | 922          |
| AAC35289  | 'Alvinella pompejana'                      | fibrillar collagen chain FAp1 alpha |         | 'MGPAGAPGLQGLTGPAGPPG              | 890          |
| AAB24972  | 'Riftia pachytila'                         | collagen alpha chain                |         | 'YRAGPRYIQAQVGPVIGPRGPF            | 1027         |
| 1920343A  | 'Ephydatia muelleri'                       | fibrillar collagen                  |         | 'MGPPGPNGEPANPVGPPGPF              | 1095         |

```
%Script for loading and analyzing data from excel file
```

```
[loaded_num_data loaded_text_data]=xlsread('LAYTON_TRICH_DATA.xls',1);  
loaded_text_data=loaded_text_data(2:end,:); %first line is headers
```

```
%create alternate scoring matrix  
unweighted_scoring=BLOSUM(80);  
%set (8,8) to zero .... remove gly weighting  
unweighted_scoring(8,8)=0;
```

```
names=cell(length(loaded_text_data),1);  
treated_seqs=cell(length(loaded_text_data),1);
```

```
for i=1:length(loaded_text_data)  
    names{i}=[loaded_text_data{i,2}, ' ', loaded_text_data{i,3}, ' ', loaded_text_data{i,4}];  
    temp=loaded_text_data{i,5};  
    treated_seqs{i}=lower(temp(isletter(temp)));  
end
```

```
seq_struct=struct('Header',names,'Sequence',treated_seqs);
```

```
mask=~ismember(1:length(seq_struct),[5 18 17]);
```

```
weighted_multialign_mat=multialign(seq_struct(mask),'verbose',true,'gapopen',@(sm,sx,len1,len2) 100*sm);  
unweighted_multialign_mat=multialign(seq_struct(mask),'ScoringMatrix',unweighted_scoring,'verbose',true,'gapopen',@(sm,sx,len1,len2) 100*sm);
```

```
weighted_distances=seqpdist(weighted_multialign_mat,'method','p-distance');  
unweighted_distances=seqpdist(unweighted_multialign_mat,'method','p-distance');
```

```
weighted_tree_dig=seqlinkage(weighted_distances,'single',seq_struct(mask));  
unweighted_tree_dig=seqlinkage(unweighted_distances,'single',seq_struct(mask));
```
